1 **Mouse Norovirus infection arrests host cell translation uncoupled from the stress granule-**  
2 **PKR-eIF2 $\alpha$  axis**

3 Svenja Fritzlar<sup>1,¶,#</sup>, Turgut E. Aktepe<sup>1,¶</sup>, Yi-Wei Chao<sup>1</sup>, Michael R. McAllaster<sup>2</sup>, Craig B. Wilen<sup>3</sup>,  
4 Peter A. White<sup>4</sup>, and Jason M. Mackenzie<sup>1</sup>

5

6 <sup>1</sup> Department of Microbiology and Immunology, University of Melbourne at the Peter Doherty  
7 Institute for Infection and Immunity, Melbourne, VIC, Australia

8 <sup>2</sup> Department of Pathology and Immunology, Washington University School of Medicine, St. Louis,  
9 MO, USA

10 <sup>3</sup> Departments of Laboratory Medicine and Immunobiology, Yale School of Medicine, New Haven,  
11 CT, USA

12 <sup>4</sup> School of Biotechnology and Biomolecular Sciences, The University of New South Wales,  
13 Sydney 2052, New South Wales, Australia

14 <sup>#</sup> Present address: Department of Microbiology, Biomedical Discovery Unit, Monash University,  
15 Melbourne, Victoria, Australia

16

17 \* Corresponding author

18 Email: [jason.mackenzie@unimelb.edu.au](mailto:jason.mackenzie@unimelb.edu.au) (JMM)

19

20 ¶ These authors contributed equally to this work. SF and TEA are Joint Authors

21

22 **Keywords:** Mouse Norovirus; Integrated Stress Response; Protein translation; eIF2 $\alpha$ ; Stress  
23 granules; Protein kinase R

24 **Running title:** MNV arrests host protein translation

## 25 **Abstract**

26           The integrated stress response (ISR) is a cellular response system activated upon different  
27 types of stresses, including viral infection, to restore cellular homeostasis. However, many viruses  
28 manipulate this response for their own advantage. In this study we investigated the association  
29 between murine norovirus (MNV) infection and the ISR and demonstrate that MNV regulates the  
30 ISR by activating and recruiting key ISR host factors. We observed that during MNV infection,  
31 there is a progressive increase in phosphorylated eukaryotic initiation factor 2 alpha (p-eIF2 $\alpha$ )  
32 resulting in the suppression of host translation, yet MNV translation still progresses under these  
33 conditions. Interestingly, the shutoff of host translation also impacts the translation of key signalling  
34 cytokines such as IFN $\beta$ , IL-6 and TNF $\alpha$ . Our subsequent analyses revealed that the phosphorylation  
35 of eIF2 $\alpha$  was mediated via Protein kinase-R (PKR), but further investigation revealed that PKR  
36 activation, phosphorylation of eIF2 $\alpha$  and translational arrest were uncoupled during infection. We  
37 further observed that stress granules (SGs) are not induced during MNV infection, and MNV has  
38 the capacity to restrict SG nucleation and formation. We observed that MNV recruited the key SG  
39 nucleating protein G3BP1 to its replication sites and intriguingly the silencing of G3BP1 negatively  
40 impacts MNV replication. Thus, it appears, MNV utilises G3BP1 to enhance replication, but  
41 equally to prevent SG formation, intimating an anti-MNV property of SGs. Overall, this study  
42 highlights MNV manipulation of SGs, PKR and translational control to regulate cytokine  
43 translation and to promote viral replication.

44

## 45 **Importance**

46           Viruses hijack host machinery and regulate cellular homeostasis to actively replicate their  
47 genome, propagate and cause disease. In retaliation, cells possess various defence mechanisms to  
48 detect, destroy and clear infecting viruses as well as signal to neighbouring cells to inform them of

49 the imminent threat. In this study, we demonstrate that the murine norovirus (MNV) infection stalls  
50 host protein translation and the production of antiviral and pro-inflammatory cytokines. However,  
51 virus replication and protein translation still ensues. We show that MNV further prevents the  
52 formation of cytoplasmic RNA granules, called stress granules (SG), by recruiting the key host  
53 protein G3BP1 to the MNV replication complex; a recruitment that is crucial to establishing and  
54 maintaining virus replication. Thus MNV promotes immune evasion of the virus by altering protein  
55 translation. Together, this evasion strategy delays innate immune responses to MNV infection and  
56 accelerates disease onset.

57

## 58 **Introduction**

59 Human noroviruses (HuNoV) are positive sense single-stranded RNA viruses and belong to  
60 the *Caliciviridae* family. They are a major cause of acute gastroenteritis in developing and  
61 developed countries (1-3). The onset of symptoms like diarrhoea, nausea, vomiting and abdominal  
62 cramps usually commences 12-48 hours after exposure to the virus and typically lasts no more than  
63 48 hours (4-6). Despite its significant health burden, there are currently no effective treatments or  
64 preventative vaccines for HuNoV infections even though vaccines are under development (7-11).  
65 Advances of antiviral agents to control HuNoV outbreaks are severely delayed by the fact that  
66 HuNoVs are difficult to cultivate in the laboratory. Recent studies have shown that HuNoV is able  
67 to replicate in B-cell like cell lines when co-cultured with specific enteric bacteria or in enteric  
68 organoids (12, 13). However viral replication is poor with only a 2-3 Log increase in viral titre and  
69 therefore, the closely related Genogroup V murine norovirus (MNV) remains a robust tissue culture  
70 system and small animal model (14).

71 The MNV genome is a ~7.5 kb positive-sense RNA molecule that encodes for 9 or 10  
72 proteins (depending on translation of open reading frames (ORFs) and cleavage of gene products  
73 (15, 16)); that have roles in replication of the viral genome, polyprotein cleavage, translation, host

74 manipulation and assembly of virus particles. The genome itself is covalently attached to the viral  
75 protein g (VPg or NS5) at its 5' end and is polyadenylated at the 3' end. The VPg protein mediates  
76 translation of the viral genome via interaction with host translation factors (17, 18). The remaining  
77 non-structural proteins (ORF1) associate with the viral replication complex (RC) in induced  
78 membrane clusters (19, 20), as well as interacting with host factors to manipulate cellular  
79 homeostasis and promote viral replication. Not all proteins encoded by ORF1 have been  
80 functionally characterised, but previous studies revealed that the MNV NS1/2 protein associates  
81 with the ER and the host protein VAP-A (21, 22), whereas NS3 associates with microtubules and  
82 lipid rich bodies in the cytoplasm (23). Further, NS7 acts as the RdRp (24, 25) and NS6 is the  
83 protease cleaving the polyprotein (26, 27).

84 Noroviruses cause acute and chronic infections that often involve manipulation of host  
85 processes and innate immune responses at multiple levels (Reviewed in 28). The introduction of  
86 viral dsRNA and proteins during MNV infection is recognised as foreign by the integrated stress  
87 response (ISR), and this can activate antiviral innate immune pathways. This recognition of  
88 infection can result in a myriad of responses with the most important being the type I and type III  
89 interferon (IFN) response (29), however the exact mechanisms employed to restrict and clear a NoV  
90 infection are not completely defined

91 In the presence of cellular stressors, the ISR can be activated by eIF2 $\alpha$  kinases such as  
92 double-stranded RNA sensor PKR, the ER-stress sensor PKR-like endoplasmic reticulum kinase  
93 (PERK), general control non-derepressible 2 kinase (GCN2) and heme-regulated kinase (HRI). The  
94 activation of these sensors can lead to the phosphorylation of eIF2 $\alpha$  which relinquishes eIF2 $\alpha$ 's  
95 ability to bind to the 40s ribosomal subunit, prompting translational stalling and the aggregation of  
96 stalled translation preinitiation complexes (30-32). Together with Ras-GAP SH3 domain binding  
97 protein (G3BP), T-cell restricted intracellular antigen 1 (TIA-1) and TIA-1 related protein (TIAR),  
98 these aggregates form stress granules (SGs) to stall translation and protect the cell from

99 accumulating misfolded proteins during viral infections. SGs contain the preinitiation complexes  
100 which are typically comprised of various initiation factors including eIF2, eIF3, eIF4 $\alpha$ , eIF4 $\beta$ ,  
101 eIF4G and eIF5, as well as the 40s ribosomal subunit which ensures that SGs reactivate translation  
102 rapidly after a successful stress recovery (33). SGs have also been shown to regulate and control  
103 cytokine mRNA aggregation and expression.

104 Several viruses manipulate the ISR to avoid immune detection by inhibiting translation and  
105 preventing the formation of SGs. Sinbis virus strongly inhibits the translation of cellular mRNA in  
106 PKR-dependent, as well as PKR-independent mechanisms (34). Influenza A virus inhibits the  
107 phosphorylation of eIF2 $\alpha$  and therefore prevents the induction of stress granules (35). Poliovirus,  
108 Herpes simplex virus 1 and West Nile virus (WNV) interfere with SG formation by cleaving or  
109 sequestering SG nucleating proteins like G3BP and TIA-1 (36-38).

110 In this study we demonstrate that MNV infection leads to the phosphorylation of eIF2 $\alpha$ , via  
111 PKR, and the subsequent host cell translational shutoff but this does not affect viral translation.  
112 However, restoration of active eIF2 $\alpha$  does not alleviate host cell translational repression suggesting  
113 that these events are uncoupled. Further, we show that this translational shut-off is associated with a  
114 decrease in cytokine translation and that MNV inhibits the formation of SGs by recruiting the SG  
115 nucleating factor G3BP1 to the sites of virus replication, a recruitment that is essential for MNV  
116 replication. Thus, we provide evidence that MNV manipulates the PKR–p-eIF2 $\alpha$ –SG axis to  
117 promote its own replication but equally as an immune evasion strategy.

118

## 119 **Results**

### 120 **MNV infection induces eIF2 $\alpha$ phosphorylation**

121 During our investigations of the intracellular replication of MNV we noticed changes in the  
122 abundance of host cell protein translation. To initially interrogate the influence of MNV on

123 translation, we investigated whether MNV infection and replication induced eIF2 $\alpha$  phosphorylation  
124 (Fig. 1 A and B). BMM cells were left untreated (mock), treated with the oxidative stressor sodium  
125 arsenite (NaAs; 250  $\mu$ M for 20 minutes (mins)) or infected with MNV for 12 hours (hrs). Our  
126 western blot (WB) analysis of whole cell lysates revealed that MNV infection, similar to the NaAs  
127 positive control, induced a robust increase in p-eIF2 $\alpha$  levels, whereas the total levels of eIF2 $\alpha$   
128 remained constant (Fig. 1A).

129 To further these initial observations, we investigated the kinetics of eIF2 $\alpha$  phosphorylation  
130 throughout the course of the viral infection. Thus, MNV-infected cell lysates were collected at 3, 6,  
131 9 and 12 hours post infection (hpi) and WB analysis was performed with antibodies for p-eIF2 $\alpha$ ,  
132 MNV NS7 and actin (Fig. 1B). Interestingly, we observed that eIF2 $\alpha$  phosphorylation levels  
133 remained constant at 3 hpi when compared to uninfected and untreated cells, however as infection  
134 progressed, there was a gradual and noticeable increase in eIF2 $\alpha$  phosphorylation at 6, 9 and 12 hpi.  
135 This indicates that MNV infection induces increased phosphorylation of eIF2 $\alpha$  as infection  
136 proceeds (Fig. 1B).

137

### 138 **eIF2 $\alpha$ phosphorylation status corresponds to a repression of host cell protein translation** 139 **during MNV infection**

140 One of the main consequences of eIF2 $\alpha$  phosphorylation is the global shutoff of host cell  
141 protein translation (39, 40). To determine the effects of increasing eIF2 $\alpha$  phosphorylation levels on  
142 cellular translation, BMM cells were infected with MNV, and at indicated times post-infection (3,  
143 6, 9, 12 and 15 hpi), cells were pulsed with puromycin for 20 mins prior to whole cell lysate  
144 collection (for WB) and cell fixation (for immunofluorescence (IF)) (Fig. 1C and D, respectively).

145 Puromycin incorporates into newly translated polypeptides and terminates the translation of  
146 the full-length protein. Thus, newly synthesised proteins, which accurately represents translational

147 activity, can therefore be visualised using an anti-puromycin antibody. Our WB analysis revealed  
148 that there was an increase in the amount of puromycin incorporated in active protein translation up  
149 to 6 hpi (Fig. 1C). However, as the infection progressed from 9 hpi (indicative by NS7 labelling)  
150 and the level of p-eIF2 $\alpha$  increased, the levels of puromycin-labelled proteins were reduced (Fig 1C).  
151 These results were supported by IF analysis demonstrating that incorporation of puromycin (Fig  
152 1D, green) was significantly diminished in MNV-infected cells from 9 hpi (Fig. 1D), whereas the  
153 uninfected mock cells still incorporated substantial amounts of puromycin (Fig. 1D). These results  
154 confirm that the MNV-induced increase in eIF2 $\alpha$  phosphorylation results in decreased host cell  
155 protein translation. Interestingly, MNV protein translation (as determined by NS7 expression)  
156 steadily increases over the course of the infection even in the presence of eIF2 $\alpha$  phosphorylation  
157 and host cell protein translation shut down (Fig. 1C).

158

159 **PKR induces the phosphorylation of eIF2 $\alpha$  during MNV infection, but translation repression**  
160 **is PKR-independent**

161 During viral infection, PKR and PERK are two major kinases induced to prevent viral  
162 replication by phosphorylating eIF2 $\alpha$  and inhibiting translation (41, 42). To investigate the potential  
163 role of PKR and/or PERK in mediating phosphorylation of eIF2 $\alpha$  during MNV infection, we  
164 utilised a PKR inhibitor (C16, shown to suppress PKR-mediated phosphorylation of eIF2 $\alpha$  (43) and  
165 a PERK inhibitor (ISRIB, shown to suppress PERK-mediated phosphorylation of eIF2 $\alpha$  (44) to  
166 treat MNV-infected RAW 264.7 cells (Fig. 2A). Cells were infected with MNV and subsequently  
167 treated with 1  $\mu$ M C16 and/or 0.5  $\mu$ M ISRIB at 1 hpi. Cell lysates were collected at 12 hpi, and WB  
168 analysis was performed using an anti-p-eIF2 $\alpha$  antibody. C16 treatment of MNV infected cells  
169 substantially decreased the levels of p-eIF2 $\alpha$  compared to untreated MNV infected cells. In  
170 contrast, we observed no apparent change in the p-eIF2 $\alpha$  levels in the ISRIB treated MNV-infected

171 cells. These results indicate that the phosphorylation of eIF2 $\alpha$  observed during MNV infection is  
172 primarily mediated via PKR and not PERK.

173 Due to our observations that eIF2 $\alpha$  phosphorylation was mediated via PKR, we speculated  
174 that inhibition of PKR activity would restore the repression of host cell protein translation.  
175 Following MNV infection and C16 treatment, cells were incubated with puromycin before  
176 harvesting lysates at 12 or 15 hpi. Similar to previous results, protein translation is severely  
177 inhibited in the untreated MNV-infected cells, however surprisingly this phenotype was also  
178 maintained even in the presence of C16 and the lack of p-eIF2 $\alpha$  (Fig. 2B). Thus, our results indicate  
179 that MNV-induced repression of host translation is uncoupled and independent of a PKR and p-  
180 eIF2 $\alpha$ -mediated mechanism and must occur via a different regulatory pathway.

181

### 182 **The MNV NS3 protein induces host cell protein translation arrest.**

183 Previous studies have suggested that the MNV protease NS6 can influence host cell protein  
184 translation via cleavage of the translation accessory factor PABP (45). To verify these observations,  
185 we expressed PABP-GFP in RAW 264.7 and infected the cells with MNV for 12 h. Neither the  
186 viral protein NS5 (VPg) nor NS6 (Protease) co-localised with PABP-GFP in infected cells and  
187 PABP-GFP expression was still observed (Fig. S1A). Further, we co-transfected cDNA expression  
188 plasmids encoding MNV NS3, NS6 or NS7 (RdRp) with PABP-GFP in HEK 293T cells. Upon co-  
189 transfection with NS6 and NS7, PABP-GFP expression levels seemed unperturbed, however co-  
190 transfecting PABP-GFP with NS3 significantly reduced PABP-GFP levels compared to the control  
191 (Fig. S1B). It is important to note that we did not detect any smaller sized protein bands for PABP-  
192 GFP that would indicate virus-induced cleavage of this protein, even in the presence of the MNV  
193 NS6 protease expressed during replication (Fig. S1B).



194 To interrogate which MNV proteins might affect host cell translation, we utilised puromycin  
195 incorporation in individual ORF1 protein transfected cells. Thus, HEK 293T and Vero cells were  
196 transfected with plasmids encoding the single ORF1 proteins and treated with puromycin prior to  
197 immunoblot or IF analysis. We observed no significant change in the amount of incorporated  
198 puromycin in cells expressing MNV NS1/2, NS4, NS5, NS6 or NS7. Intriguingly, we observed a  
199 profound absence of puromycin incorporation in cells expressing the MNV NS3 protein (Figs. 3A,  
200 B and C). These results suggest that the MNV NS3 has an impact on the host protein translational  
201 efficiency. In contrast to previous reports, we observed that the MNV NS6 protease did not  
202 influence host protein translation, nor cleave the translation accessory factor PABP (Fig. S1).

203

#### 204 **MNV-induced suppression of host cell protein translation results in the inability of infected** 205 **cells to produce major cytokines**

206 The innate immune response is crucial during MNV infection, specifically STAT1 and type  
207 I and III IFNs play essential roles in combatting infection (14). We were interested in investigating  
208 the impact of impaired protein translation on the innate immune response to MNV infection, and  
209 investigated the cytokines IFN $\beta$ , TNF $\alpha$  and IL-6 as they are representatives of major immune  
210 response pathways. First, we tested whether MNV infection induces the transcriptional activation of  
211 IFN $\beta$ , TNF $\alpha$  and IL-6. We infected RAW 264.7 with MNV, treated them with Poly(I:C) or left  
212 them untreated for 9, 12 and 15 hrs. Transcription levels were assessed using RT-qPCR and  
213 compared to mock untreated cells (Fig. 4A). Poly(I:C) stimulation led to the robust induction of  
214 IFN $\beta$ , TNF $\alpha$  and IL-6 transcription, observed through increasing mRNA levels compared to  
215 untreated cells. MNV infected cells also showed similar increases in mRNA levels for both IFN $\beta$   
216 and TNF $\alpha$  compared to Poly(I:C) treated cells (Fig 4A, i and ii), however, although we observe a  
217 slight increase in IL-6 transcriptional response, this increase was much less profound (Fig. 4A, iii).

218 To test if the translation of these major cytokines is affected by the global host translation  
219 shutoff during MNV infection, we infected RAW 264.7 cells with MNV, treated them with  
220 Poly(I:C) and the secretion inhibitor Brefeldin A (BFA), or left them untreated (Fig. 4B). Cell  
221 culture supernatant samples were harvested at 9, 12 and 15 h.p.i and cytokine secretion was  
222 measured via ELISA. Untreated cells, as well as cells stimulated with Poly(I:C) but treated with  
223 BFA, secreted no or only low amounts of IFN $\beta$ , TNF $\alpha$  and IL-6 at any time point tested. In  
224 contrast, Poly(I:C) stimulated cells released high amounts of all three cytokines into the tissue  
225 culture supernatant as early as 9 hrs post treatment. Interestingly, cells infected with MNV showed  
226 significantly lower amounts of IFN $\beta$ , TNF $\alpha$  and IL-6 being secreted into the cell supernatant  
227 compared to Poly(I:C) treated cells (Fig. 4B). Cytokine levels observed for MNV infected cells  
228 were similar to Poly(I:C) and BFA treated cells suggesting that secretion might be inhibited,  
229 comparable to the function of BFA. Surprisingly, general protein secretion is not disturbed in MNV  
230 infected macrophages (Fig. S2), indicating that the reduction in protein levels is likely related to our  
231 observed MNV-induced translational inhibition.

232

### 233 **MNV infection inhibits stress granule formation**

234 One of the control mechanisms for translation of interferon stimulated genes (ISGs) and  
235 cytokines is the sequestering of the encoding mRNA within cytoplasmic RNA granules *e.g.* SGs  
236 (46, 47). Based on our observed profound effect of MNV infection on host cell translation and  
237 innate immune associated pathways, we aimed to investigate whether MNV replication also  
238 manipulated the formation of SGs. Thus, BMM cells were infected with MNV for 12 hrs and cells  
239 were analysed by IF with specific antibodies against the SG marker eIF3 $\eta$ , and the viral VPg  
240 protein NS5 (Fig. 5A). In uninfected control cells SG formation was not observed (panels A-C),  
241 however, treatment with NaAs induced the formation of numerous and obvious round shaped  
242 cytoplasmic puncta (Fig 5A, G-I, arrow head). Interestingly, cells infected with MNV did not

243 appears to contain SGs (panels D-F, arrow head), suggesting that MNV-infection either does not  
244 induce SG formation, or that the virus is inhibiting the formation of SGs.

245 To determine if MNV interferes with SG formation, cells were treated with NaAs and  
246 subsequently infected with MNV for 12 hrs (Fig. 5A, panels J-L). We observed an inhibitory effect  
247 of MNV on the amount of NaAs-induced SGs (Fig. 5A, panels J-L) compared to NaAs-treated  
248 uninfected cells (Fig. 5A, panels G-I). In NaAs treated and MNV-infected cells exhibiting SG  
249 formation, the morphology of SGs was smaller and elongated, instead of having a typical, round-  
250 shaped appearance (Fig. 5A, panels J-L). To quantitate the changes observed, we determined the  
251 number of SG foci within MNV infected and uninfected cells in the presence of NaAs (Fig. 5B and  
252 C). MNV infected cells displayed a significantly lower number of SGs within the cell compared to  
253 uninfected cells during NaAs-treatment. In uninfected cells, an average of 4 SGs per cell were  
254 observed (Fig. 5B, blue) with only 4% of cells (9 cells) containing no SGs (Fig. 5C, blue). In  
255 contrast, infected cells had only an average of 2 SGs per cell (Fig. 5B, red) and 45% of infected  
256 cells (82 cells) contained no SGs at all (Fig. 5C, red). Intriguingly, our observations are contrast to  
257 those of Humoud *et al.* (48) who observed that MNV infection did not impact on arsenite-induced  
258 SG assembly.

259 Previous reports have indicated that some viruses prevent the induction of SGs by viral  
260 protease-mediated cleavage of G3BP1 and other accessory proteins (49). To determine if this was  
261 also true for MNV infection, we investigated the protein levels of eIF3 $\alpha$ , G3BP1 and TIA-1 by  
262 WB. To this end, we observed no significant change in the total protein levels or size of any of  
263 these proteins as infection progressed, indicating that MNV does not manipulate SG formation  
264 through protease-mediated cleavage of key SG proteins (Fig 5D). These results suggest that MNV  
265 does not induce SGs even though eIF2 $\alpha$  is phosphorylated and has an inhibitory effect on SG  
266 induction.

267

268 **MNV recruits the key SG nucleating proteins G3BP1 to the sites of virus replication which is**  
269 **critical for efficient MNV replication.**

270 To examine the ability of MNV to prevent SG induction we visualised the distribution and  
271 abundance of key SG nucleating proteins eIF3 $\alpha$  and G3BP1 by IF analysis in MNV-infected BMM  
272 cells (Fig. 6). We observed no significant altered distribution of eIF3 $\alpha$  in MNV-infected cells,  
273 either at the sites of viral replication or to discrete cytoplasmic foci (Fig. 6A, i compared to a). In  
274 contrast, we observed a dramatic redistribution and sequestering of G3BP1 to the sites of MNV  
275 replication as identified with antibodies to the MNV VPg protein (NS5) (Fig. 6A, j compared to b).  
276 The sequestering of G3BP1 also occurred in MNV-infected cells that were additionally treated with  
277 NaAs (Fig. 6A, n compared to f).

278 As we had observed that G3BP1 had been sequestered within the MNV RC, we aimed to  
279 determine if this was a functional consequence for evasion of the SG antiviral response or a  
280 requirement for replication. Intriguingly in a recent CRISPR screen, G3BP1 was observed as the  
281 second most critical host factor, next to the receptor CD300lf, in facilitating MNV infection and  
282 replication (50). As the CRISPR knock-out of G3BP1 was observed to be completely inhibit  
283 infection, we utilised RNAi-mediated suppression of G3BP1 to identify how MNV may require  
284 G3BP1 for replication. Thus, cells were incubated with different RNAi's specific for the murine  
285 *G3bp1* gene and suppression of G3BP1 expression was assessed by WB analysis. siRNA-mediated  
286 treatment resulted in a reduction of the G3BP1 protein (Fig. 6B). Upon subsequent infection of  
287 these cells we observed an attenuation in MNV replication, by WB (NS7) (Fig. 6B) and the  
288 production of infectious virus, as assessed by plaque assays where virus titres with a 1-1/2 logs  
289 reduction (representing an ~90-95% decrease in infectious virus) were observed (Fig. 6C).

290 To further examine the impact of G3BP1 on MNV replication, we knocked out G3BP1  
291 expression in BV2 cells via CRISPR-Cas9 (G3BP1-KO). In G3BP1-KO BV2 cells, we re-  
292 introduced G3BP1 by transfecting wild type mouse G3BP1 (WT-mG3BP1) and two mG3BP1

293 deletion mutants: mG3BP1- $\Delta$ RGG ( $\Delta$ RGG; deletion of the co-operative RNA binding domain  
294 (RGG) from aa408-465) and mG3BP1- $\Delta$ RRMRGG ( $\Delta$ RRMRGG; additionally includes RNA-  
295 binding domain (RRM) from aa340-407) as well as an empty vector (Fig. 6D and E). We infected  
296 these cells with MNV and collected virus containing tissue culture fluid at 12 and 24 h.p.i to  
297 measure viral titres. In WT-BV2 cells, peak virus replication ( $10^7$  PFU/mL) was observed after 12  
298 h.p.i and this level remained steady until 24 h.p.i (Fig. 6E, blue line). Consistent with our siRNA  
299 results, knockout of G3BP1 resulted in the complete abolishment of virus replication, highlighting  
300 the importance of G3BP1 for MNV replication (Fig. 6E, green line). Interestingly, the re-  
301 introduction of WT-mG3BP1 into mG3BP1-KO cells completely restored virus replication to WT  
302 BV2 levels ( $10^7$  PFU/mL) by 24 h.p.i, however the rescue of MNV replication was delayed by 12  
303 hrs (Fig. 6E, red line). Furthermore, removal of the G3BP1- $\Delta$ RGG domain resulted in the partial  
304 rescue of MNV replication ( $10^5$  PFU/mL, 2 logs lower than WT BV2) by 24 h.p.i (Fig. 6E, purple  
305 line), however the removal of the G3BP1- $\Delta$ RRMRGG domains resulted in a 4-log reduction of  
306 viral titres (Fig. 6E, orange line)

307         Based on these observations we suggest that the recruitment of G3BP1 to the MNV RC is  
308 essential for virus replication. At this point we have not been able to identify at what stage and how  
309 G3BP1 contributes to MNV replication, however we would speculate that it contributes to binding  
310 of the MNV viral RNA perhaps to stabilise some protein-RNA interactions. It is important to note  
311 that sequestration of G3BP1 is also critical to prevent SG formation and promote viral replication  
312 without interference of the innate immune response.

313

## 314 **Discussion**

315         The shutdown of host cell translation is one of the major host defence mechanisms against  
316 viral infections. Viral replication is completely dependent on host cell translation, as viruses lack  
317 their own translational machinery and parasitise the hosts. Therefore, a reduction in host protein

318 translation will likely lead to a decreased translation of viral proteins and interfere with efficient  
319 viral replication. Interestingly, translation of viral proteins like NS7, the viral polymerase, does not  
320 seem to be affected by the reduced host protein translation during MNV infection, because  
321 intracellular amounts of NS7 increase from 6 hpi onwards, while host protein translation subsides  
322 (Fig. 1B). These observations strongly suggest that MNV employs an alternative mechanism to  
323 initiate translation, independent of cellular protein translation (51). The HuNoV and MNV VPg  
324 proteins have been shown to interact with the translation initiation complex through eIF4GI and  
325 eIF4E, suggesting a role of NS5 in the initiation of viral protein translation (52, 53). Translation of  
326 MNV proteins, which is independent of the cellular cap-dependent protein translation, could be  
327 mediated by VPg and allow viral protein translation to occur in the absence of cellular protein  
328 translation (54). This would be a great advantage for the virus, not only by forcing the cell to  
329 preferentially translate viral proteins, but also by diminishing the innate immune response by  
330 preventing the translation of immune effectors such as cytokines.

331 To uncover how MNV manipulates the ISR, we investigated the PKR/eIF2 $\alpha$  pathway, which  
332 is a major regulator of the ISR (Fig 1, 2 and 3). We demonstrated that MNV infection leads to the  
333 phosphorylation of eIF2 $\alpha$ , supporting the observations by Humoud *et al.* (48), and as infection  
334 progresses the amount of p-eIF2 $\alpha$  drastically increases resulting in timely host cell translational  
335 shutoff (Fig. 1). Even though translation was upregulated early during the infection (6 hpi), there  
336 was a continuous decrease in the amount of puromycylated proteins at later stages of the infection  
337 (from 9 hpi), indicating a reduction in global host cell translation (Fig. 1B). Based on the  
338 immunoblot and IF analysis (Fig. 1C), MNV starts to affect host cell translation from 9 hpi,  
339 reducing host cell translation to a minimum in most infected cells by 12 hpi (Fig. 1C). Expression  
340 studies of single viral proteins revealed that NS3 expression alone is sufficient to induce translation  
341 inhibition (Fig. 3).

342 We presumed that p-eIF2 $\alpha$  may be regulated via PKR which is activated by binding to  
343 dsRNA produced during MNV infection. We initially showed that phosphorylation of eIF2 $\alpha$  was  
344 mediated via PKR rather than PERK (Fig 2). Interestingly though, when cells were treated with C16  
345 and analysed for their translation activity via puromycin treatment, we did not observe an increase  
346 in host cell translation activity in MNV-infected cells compared to infected, but untreated cells (Fig  
347 2B). These observations show that the PKR/eIF2 $\alpha$  axis is activated during MNV infection but is not  
348 solely responsible for the host cell translation shutdown. However, the shutdown of host translation  
349 by MNV is effective and robust (Fig. 3) and we show that it affects the translation of innate immune  
350 response regulators like cytokines (Fig. 4).

351 The release of cytokines such as IFN $\beta$ , TNF $\alpha$  and IL-6 during viral infections plays a crucial  
352 role in the innate immune response against viruses. The transcription and translation of cytokines  
353 are elevated in virus infected cells, mostly due to the recognition of PAMPs, e.g. dsRNA. Cytokines  
354 are then secreted into the extracellular space where they can either bind to receptors on  
355 neighbouring cells or to receptors on the infected cell itself to enhance the antiviral response (55).  
356 We and others have shown that MNV infected cells increase the transcription of cytokine (IFN $\beta$ ,  
357 TNF $\alpha$  and IL-6) mRNAs (Fig. 4) (56, 57) indicating that PRRs like MDA5 (58) have successfully  
358 detected the viral infection and activated an antiviral response against it. Intriguingly, MNV  
359 infected cells do not secrete significant levels cytokines which would help to overcome and contain  
360 the acute infection (Fig. 4). Our subsequent studies revealed that the low amounts of secreted  
361 cytokines from infected cells were not due to the inhibition of general protein secretion (Fig. S2).  
362 Instead, we observed that only very low amounts of translated cytokines can be detected within the  
363 infected cells, further confirming that there is no secretion inhibition, which would cause the  
364 accumulation of cytokines within the cells (Fig. 4). The difference in intracellular protein levels for  
365 TNF $\alpha$  compared to the mRNA levels indicates an interference of the virus with either protein  
366 stability or the translation of host cell proteins.

367 Like all viruses, MNV must modulate host responses to provide conditions suitable for  
368 intracellular replication. To replicate successfully, MNV must also control the localisation of viral  
369 RNA within the host cell, as these replication by-products are highly immuno-stimulatory. SG  
370 formation, which is part of the ISR, generates cytoplasmic granules containing stalled translational  
371 machineries involved in regulating RNA transcript homeostasis (59). This mechanism serves as an  
372 extension of translation by sequestering mRNA from active translation, whilst allowing the  
373 translation of certain mRNAs. This translational regulation is typically induced upon exposure to  
374 cellular stresses including ER stress, oxidative stress, heat shock (60, 61) and viral infection (59).  
375 Under stressed conditions, cells activate eIF2 $\alpha$  kinases to phosphorylate eIF2 $\alpha$  which depletes the  
376 eIF2 $\alpha$ -GTP-tRNA<sup>met</sup> ternary complex required to form the preinitiation complex, resulting in  
377 stalled translation initiation (31, 32). These stalled preinitiation complexes aggregate and form SGs,  
378 thereby general protein translation is inhibited (30). This host response to infection can affect  
379 cytokine translation, thus some viruses have devised strategies to regulate RNA granule function to  
380 selectively control RNA translation, and therefore promote their replication (Reviewed in 28, 62).

381 Previous studies have shown that many different virus families modulate SG function to  
382 allow efficient replication (63). Thus, as we observed eIF2a phosphorylation in MNV infected cells,  
383 we extended our IF analysis to examine whether SGs form during MNV infection. We  
384 demonstrated via IF that SGs are reduced during MNV infection, although eIF2 $\alpha$  is phosphorylated.  
385 In fact, when cells are treated with NaAs, MNV infection significantly dampened SG formation and  
386 SGs that were present had atypical morphologies and reduced SG numbers (Fig. 5A and B). These  
387 results not only suggest MNV infection does not induce SG formation, but MNV can also exert  
388 control over SG formation. Intriguingly, Humoud *et al.* (48) did not observe these findings and it is  
389 difficult to reconcile their findings to ours. The only difference is they utilised J774 macrophages in  
390 their study potentially identifying subtle cell type differences.



391 We have shown that MNV recruits G3BP1 to sites of viral replication (Fig. 6A) and  
392 demonstrate through siRNA-mediated knockdown and CRISPR-Cas9 depletion of G3BP1 that it is  
393 required for efficient viral replication (Figs. 6). We postulate that MNV recruits G3BP1 to sites of  
394 viral replication where G3BP1 binds to viral RNA via the RNA Recognising Motif (RRM). G3BP1  
395 recruitment to the assembly complex seems to serve a dual purpose, i) the promotion of viral  
396 replication (presumably by aiding in RNA duplex unwinding), and ii) the prevention of SG  
397 formation.

398 Based on our findings, MNV likely employs a strategy similar to picornaviruses and  
399 alphaviruses to evade the innate immune response by inducing the inhibition of host cell translation  
400 (64-68). During MNV infection, shutdown of host translation is independent of the SG-PKR-eIF2 $\alpha$   
401 axis and PABP cleavage and seems to be regulated through an unknown mechanism (Fig. 7,  
402 model). It will be interesting to investigate if MNV cleaves other components of the translation  
403 complex, or if it regulates the host translation shutdown through another pathway, like miRNA or  
404 preferred binding of viral mRNA to the translation complex. Overall, it is important to note that the  
405 MNV NS3 protein allows the inhibition of cap-dependent host cell translation, while inhibiting the  
406 formation of SGs by recruiting G3BP1 to the MNV RC, which sequester stalled pre-translation  
407 complexes containing essential components of the translational machinery (Fig. 7, model). It is  
408 intriguing to speculate that MNV selectively induces cap-dependent translation inhibition to  
409 enhance viral translation and inhibit the innate immune response but needs access to the  
410 translational machinery and therefore inhibits SG formation. This strategy not only increases viral  
411 replication efficiency, but also promotes immune evasion of the virus, which could explain the  
412 rapid replication cycle and the delayed innate immune response to MNV infection.

413

## 414 **Materials and Methods**

### 415 **Cell lines:**

416 RAW 264.7 murine macrophages, bone marrow-derived macrophages (BMM) Vero and  
417 HEK 293T cells were maintained in Dulbecco's Modified Eagle's Medium (DMEM) (Gibco)  
418 supplemented with 10% foetal calf serum (FCS) (Gibco) and 1% GlutaMAX (200mM) (Gibco).  
419 BV2 cells were cultured in DMEM with 10% FBS, 1% HEPES and 1% GlutaMAX. All cell lines  
420 were cultivated at 37°C in a 5% CO<sub>2</sub> incubator, as previously described (19).

### 421 **MNV infection:**

422 RAW 264.7 macrophages, BMMs and BV2 cells were infected with MNV at a multiplicity  
423 of infection (MOI) of 5, as previously described (19). Cells were rocked in a low volume of media  
424 for one hour at 37 °C, before cells were supplemented with additional media. Unless indicated  
425 differently, cells were fixed or lysed at 12 h.p.i. If supernatant was collected, the media was  
426 centrifuged at 10,000g for 3 min to pellet cellular debris.

### 427 **Chemicals and Antibodies:**

428 Sodium arsenite (Sigma-Aldrich) was added to cells at a concentration of 250 µM for 20  
429 mins prior to fixation or cell lysate collection. The PKR inhibitor C16 (Sigma-Aldrich) was added  
430 to infected cells at a concentration of 1 µM at 1 h.p.i and cell lysates were collected 12 h.p.i. The  
431 ISR inhibitor ISRIB (Sigma-Aldrich) was added 1 h.p.i at 0.5 µM. Puromycin (Life Technologies)  
432 was added to cells at a concentration of 10 µg/ml at indicated times prior to cell lysate collection.  
433 Goat anti-eIF3η, Goat anti-G3BP1 and Goat anti-TIA-1 were all purchased from Santa Cruz  
434 Biotech. Rabbit anti-eIF2α was purchased from Invitrogen; Rabbit anti-actin from Sigma-Aldrich;  
435 Mouse anti-puromycin from Kerfast Inc; Mouse anti-G3BP1, Mouse anti-GAPDH, Rabbit anti-  
436 HIS and Rabbit anti-calnexin from Abcam and Rabbit anti-p-eIF2α (S52) and Alexa Fluor-

437 conjugated species-specific IgG were purchased from Life Technologies. Rabbit anti-NS7 and  
438 Rabbit anti-NS5 were manufactured and produced by Invitrogen.

439 **Plaque Assay:**

440  $3.0 \times 10^5$  RAW264.7 or BV2 cells were seeded onto 12 well plates and incubated 37°C until  
441 70% confluent. Virus-containing supernatants were ten-fold serially diluted in DMEM, added to  
442 plates and rocked every 10 mins for 1 hr at 37°C. Following incubation, plaque assay overlay (70%  
443 DMEM, 2.5% v/v FCS, 13.3 mM NaHCO<sub>3</sub>, 22.4 mM 4-(2-hydroxyethyl)-1-  
444 piperazineethanesulfonic acid (HEPES), 200 mM GlutaMAX and 0.35 % w/v low-melting-point  
445 (LMP) agarose) was added to each well. Overlay was solidified at 4°C for 15 mins and incubated at  
446 37°C for 48 hrs. Cells were fixed in 10% formalin for 1 hr at RT. Plaque assay overlay was  
447 removed and cells were stained with 1 ml of Toluidine blue for 30 min. Stain was removed, rinsed  
448 with water and plaque formations were enumerated.

449 **Immunofluorescence microscopy**

450 Cells were rinsed twice with Phosphate buffered saline (PBS) and fixed 4% v/v  
451 paraformaldehyde (PFA)/PBS for 15 min at RT. Fixative was removed and cells were  
452 permeabilised with 0.1% v/v Triton X-100 for 10 min at RT. Cells were rinsed twice with PBS and  
453 quenched with 0.2 M glycine for 10 mins at RT. Cells were then rinsed with PBS and coverslips  
454 were incubated in primary antibodies diluted in 25 µl of 1% bovine serum albumin (BSA)/PBS for  
455 1 hr at RT. Following incubation with primary antibodies, cells were washed thrice with  
456 0.1% BSA/PBS. Coverslips were incubated in secondary antibodies diluted in 25 µl of  
457 1 % BSA/PBS for 45 min at RT. Cells were washed twice with PBS and incubated for 5 mins with  
458 4,6-diamidino-2-phenylindole (DAPI) (0.33 µg/ml) in PBS. Coverslips were rinsed twice with PBS  
459 and MilliQ water and mounted on cover-slides with ProLong Diamond (Life Technologies). Cells  
460 were analysed using the Zeiss LSM710 confocal microscope.

## 461 **Western Blot Analysis**

462 Cells were lysed with NP-40 lysis buffer containing protease inhibitor cocktail and  
463 phosphatase inhibitors. Samples were separated on a bis/tris polyacrylamide gel and transferred to a  
464 PVDF membrane. The membrane was blocked with 5% BSA/PBS-T for 2 h. Primary antibodies  
465 were added in 5 % BSA/PBS-T and incubated overnight at 4 °C. The following day, the membrane  
466 was washed 3 x with PBS-T and then incubated with secondary antibody in PBS-T for 90 mins at  
467 RT. The membrane was then washed four times in PBS-T then visualised using the MF-ChemiBIS  
468 DNR (Bio-imaging Systems).

## 469 **ELISA**

470 Cell culture supernatants were analysed for their cytokine concentration using mouse  
471 specific  
472 ELISA kits for the following cytokines: IFN $\beta$  (LEGEND MAX<sup>TM</sup>, BioLegend) and TNF $\alpha$   
473 (ELISAKIT.com). Tissue culture supernatants and standards were applied to the 96-well pre-coated  
474 assay plate and incubated for 2 h. Wells were washed 4 x in assay wash buffer, before adding the  
475 assay specific biotin-labelled detection antibody. Plates were incubated for 2 hrs at room  
476 temperature, wells were washed again 4 x with the assay wash buffer. A streptavidin conjugated  
477 HRP was added afterwards and incubated for a further 45 min. Plates were washed thoroughly 6 x  
478 with wash buffer and the TMB substrate was added. Plates were checked every 3-5 min to observe  
479 the colour change. The reaction was stopped using the assay stop solution. Absorbance at 450 nm  
480 and 570 nm (background) was measured using the CLARIOstar<sup>®</sup> microplate. Cytokine  
481 concentrations were calculated using the ELISAanalysis.com website.

## 482 **qRT-PCR**

483 Cells for RNA extraction were lysed with Trizol (Life Technologies). The total RNA was  
484 isolated by phenol:chloroform extraction and then stored at -80°C. Total RNA concentration was  
485 quantified using a Nanodrop and 1  $\mu$ g of total RNA was treated with RQ1 DNase (Promega) at 37

486 °C for 45 mins. cDNA was generated by reverse-transcription using Sensifast RT (Bioline) at 25°C  
487 for 10 mins, 42°C for 15 mins and 85°C for 5 mins. cDNA levels were quantified by qPCR with  
488 Sybr GreenER (Bio-Rad) using the following cycling conditions (50°C for 8 mins, 95°C for 2 mins,  
489 40 cycles of 15 secs at 95°C, 1 min annealing/extension at 60°C followed by final extension of 10  
490 mins). Fold induction of RNA was compared to the housekeeping gene (GADPH) and error bars  
491 indicate mean +/- SEM from triplicate experiments.

#### 492 **RNAi-mediated depletion of G3BP1**

493 BMM cells were reverse transfected with 0.25 µM siRNA (Bioneer) and RNAiMAX  
494 (Invitrogen) in opti-MEM (Gibco). Cells were incubated at 37°C, 5% CO<sub>2</sub> for 24 hrs. The  
495 following day, cells were once again transfected with 0.5 µM siRNA. 24 hrs post transfection; cells  
496 were infected with MNV at a MOI of 5 for 1 hour, transfected with 0.5 µM siRNA and incubated  
497 for a further 12 hrs. Twelve hrs post infection, whole cell lysates and supernatants were collected  
498 for WB and plaque assay, respectively.

#### 499 **Generation of G3BP1 KO cells via CRISPR-Cas9**

500 BV2 cells were cultured in DMEM containing 10% FBS and 1% HEPES. BV2 cells were  
501 transiently transfected with Cas9 and a sgRNA (5' TTCCCCGGCCCCGGCTGATGNGG 3')  
502 targeting exon 7 of G3BP1. BV2 cells were then single cell cloned and G3BP1 was sequenced by  
503 Illumina HiSeq. BV2 cells are polyploid at the G3BP1 locus as described previously (PMID:  
504 27540007). Clone 1A3 had four independent deletions at the sgRNA binding site resulting in two  
505 unique 1 base pair deletions in addition to 4 and 10 base pair deletions. The mutations introduced  
506 resulted in frame shifts and the absence of detectable G3BP1 protein as measured by WB.  
507 Sequences are available upon request.

508

#### 509 **Authors Contributions**

510 **Conceptualization:** Jason M. Mackenzie, Craig B. Wilen, Peter A. White

511 **Data curation:** Turgut E. Aktepe, Svenja Fritzlar, Yi-Wei Chao, Michael R. McAllaster  
512 **Formal analysis:** Turgut E. Aktepe, Svenja Fritzlar, Yi-Wei Chao, Michael R. McAllaster  
513 **Funding acquisition:** Jason M. Mackenzie, Craig B. Wilen, Peter A. White  
514 **Investigation:** Turgut E. Aktepe, Svenja Fritzlar, Yi-Wei Chao, Michael R. McAllaster  
515 **Methodology:** Turgut E. Aktepe, Svenja Fritzlar, Yi-Wei Chao, Michael R. McAllaster, Craig B.  
516 Wilen, Peter A. White, Jason M. Mackenzie  
517 **Project administration:** Jason M. Mackenzie, Craig B. Wilen, Peter A. White  
518 **Supervision:** Jason M. Mackenzie, Craig B. Wilen, Peter A. White  
519 **Validation:** Turgut E. Aktepe, Svenja Fritzlar, Yi-Wei Chao, Michael R. McAllaster, Craig B.  
520 Wilen, Jason M. Mackenzie  
521 **Visualization:** Turgut E. Aktepe, Svenja Fritzlar, Jason M. Mackenzie  
522 **Writing – original draft preparation:** Turgut E. Aktepe, Svenja Fritzlar, Jason M. Mackenzie  
523 **Writing – review and editing:** Turgut E. Aktepe, Svenja Fritzlar, Yi-Wei Chao, Michael R.  
524 McAllaster, Craig B. Wilen, Peter A. White, Jason M. Mackenzie

525

## 526 **Acknowledgements**

527 We thank Herbert “Skip” Virgin for his help, knowledge and guidance throughout this study. This  
528 work was funded by a National Health and Medical Research Council project grants (APP1083139  
529 and APP1123135) awarded to JMM and PAW. CBW was supported by NIH grant K08 A128043.

530

## 531 **References**

532 1. Hall AJ, Lopman BA, Payne DC, Patel MM, Gastanaduy PA, Vinje J, Parashar UD. 2013.  
533 Norovirus disease in the United States. *Emerg Infect Dis* 19:1198-205.

- 534 2. Lopman BA, Hall AJ, Curns AT, Parashar UD. 2011. Increasing rates of gastroenteritis  
535 hospital discharges in US adults and the contribution of norovirus, 1996-2007. *Clin Infect*  
536 *Dis* 52:466-74.
- 537 3. Scallan E, Hoekstra RM, Angulo FJ, Tauxe RV, Widdowson MA, Roy SL, Jones JL, Griffin  
538 PM. 2011. Foodborne illness acquired in the United States--major pathogens. *Emerg Infect*  
539 *Dis* 17:7-15.
- 540 4. Adler JL, Zickl R. 1969. Winter vomiting disease. *J Infect Dis* 119:668-73.
- 541 5. Rockx B, De Wit M, Vennema H, Vinje J, De Bruin E, Van Duynhoven Y, Koopmans M.  
542 2002. Natural history of human calicivirus infection: a prospective cohort study. *Clin Infect*  
543 *Dis* 35:246-53.
- 544 6. Graham DY, Jiang X, Tanaka T, Opekun AR, Madore HP, Estes MK. 1994. Norwalk virus  
545 infection of volunteers: new insights based on improved assays. *J Infect Dis* 170:34-43.
- 546 7. Atmar RL, Bernstein DI, Harro CD, Al-Ibrahim MS, Chen WH, Ferreira J, Estes MK,  
547 Graham DY, Opekun AR, Richardson C, Mendelman PM. 2011. Norovirus vaccine against  
548 experimental human Norwalk Virus illness. *N Engl J Med* 365:2178-87.
- 549 8. Atmar RL, Estes MK. 2012. Norovirus vaccine development: next steps. *Expert Rev*  
550 *Vaccines* 11:1023-5.
- 551 9. Lindesmith LC, Mallory ML, Jones TA, Richardson C, Goodwin RR, Baehner F,  
552 Mendelman PM, Bargatze RF, Baric RS. 2017. Impact of Pre-exposure History and Host  
553 Genetics on Antibody Avidity Following Norovirus Vaccination. *J Infect Dis* 215:984-991.
- 554 10. Lindesmith LC, Ferris MT, Mullan CW, Ferreira J, Debbink K, Swanstrom J, Richardson C,  
555 Goodwin RR, Baehner F, Mendelman PM, Bargatze RF, Baric RS. 2015. Broad blockade  
556 antibody responses in human volunteers after immunization with a multivalent norovirus  
557 VLP candidate vaccine: immunological analyses from a phase I clinical trial. *PLoS Med*  
558 12:e1001807.

- 559 11. El-Kamary SS, Pasetti MF, Mendelman PM, Frey SE, Bernstein DI, Treanor JJ, Ferreira J,  
560 Chen WH, Sublett R, Richardson C, Bargatze RF, Sztein MB, Tacket CO. 2010. Adjuvanted  
561 intranasal Norwalk virus-like particle vaccine elicits antibodies and antibody-secreting cells  
562 that express homing receptors for mucosal and peripheral lymphoid tissues. *J Infect Dis*  
563 202:1649-58.
- 564 12. Jones MK, Watanabe M, Zhu S, Graves CL, Keyes LR, Grau KR, Gonzalez-Hernandez  
565 MB, Iovine NM, Wobus CE, Vinje J, Tibbetts SA, Wallet SM, Karst SM. 2014. Enteric  
566 bacteria promote human and mouse norovirus infection of B cells. *Science* 346:755-9.
- 567 13. Ettayebi K, Crawford SE, Murakami K, Broughman JR, Karandikar U, Tenge VR, Neill FH,  
568 Blutt SE, Zeng XL, Qu L, Kou B, Opekun AR, Burrin D, Graham DY, Ramani S, Atmar  
569 RL, Estes MK. 2016. Replication of human noroviruses in stem cell-derived human  
570 enteroids. *Science* 353:1387-1393.
- 571 14. Wobus CE, Karst SM, Thackray LB, Chang K-O, Sosnovtsev SV, Belliot G, Krug A,  
572 Mackenzie JM, Green KY, Virgin IV HW. 2004. Replication of Norovirus in cell culture  
573 reveals a tropism for dendritic cells and macrophages. *PLoS Biol* 2:e432.
- 574 15. Karst SM, Wobus CE, Lay M, Davidson J, Virgin HWt. 2003. STAT1-dependent innate  
575 immunity to a Norwalk-like virus. *Science* 299:1575-8.
- 576 16. McFadden N, Bailey D, Carrara G, Benson A, Chaudhry Y, Shortland A, Heeney J,  
577 Yarovinsky F, Simmonds P, Macdonald A, Goodfellow I. 2011. Norovirus regulation of the  
578 innate immune response and apoptosis occurs via the product of the alternative open reading  
579 frame 4. *PLoS Pathog* 7:e1002413.
- 580 17. Daughenbaugh KF, Wobus CE, Hardy ME. 2006. VPg of murine norovirus binds translation  
581 initiation factors in infected cells. *Virol J* 3:33.



- 582 18. Goodfellow I, Chaudhry Y, Gioldasi I, Gerondopoulos A, Natoni A, Labrie L, Laliberte JF,  
583 Roberts L. 2005. Calicivirus translation initiation requires an interaction between VPg and  
584 eIF 4 E. *EMBO Rep* 6:968-72.
- 585 19. Hyde JL, Sosnovtsev SV, Green KY, Wobus C, Virgin HW, Mackenzie JM. 2009. Mouse  
586 norovirus replication is associated with virus-induced vesicle clusters originating from  
587 membranes derived from the secretory pathway. *J Virol* 83:9709-19.
- 588 20. Hyde JL, Gillespie LK, Mackenzie JM. 2012. Mouse Norovirus 1 Utilizes the Cytoskeleton  
589 Network To Establish Localization of the Replication Complex Proximal to the Microtubule  
590 Organizing Center. *Journal of Virology* 86:4110.
- 591 21. McCune BT, Tang W, Lu J, Eaglesham JB, Thorne L, Mayer AE, Condiff E, Nice TJ,  
592 Goodfellow I, Krezel AM, Virgin HW. 2017. Noroviruses Co-opt the Function of Host  
593 Proteins VAPA and VAPB for Replication via a Phenylalanine–Phenylalanine-Acidic-  
594 Tract-Motif Mimic in Nonstructural Viral Protein NS1/2. *mBio* 8:e00668-17.
- 595 22. Hyde JL, Mackenzie JM. 2010. Subcellular localization of the MNV-1 ORF1 proteins and  
596 their potential roles in the formation of the MNV-1 replication complex. *Virology* 406:138-  
597 48.
- 598 23. Cotton BT, Hyde JL, Sarvestani ST, Sosnovtsev SV, Green KY, White PA, Mackenzie JM.  
599 2017. The Norovirus NS3 Protein Is a Dynamic Lipid- and Microtubule-Associated Protein  
600 Involved in Viral RNA Replication. *J Virol* 91.
- 601 24. Zamyatkin DF, Parra F, Alonso JMM, Harki DA, Peterson BR, Grochulski P, Ng KK-S.  
602 2008. Structural insights into mechanisms of catalysis and inhibition in Norwalk virus  
603 polymerase. *Journal of Biological Chemistry* 283:7705-7712.
- 604 25. Högbom M, Jäger K, Robel I, Unge T, Rohayem J. 2009. The active form of the norovirus  
605 RNA-dependent RNA polymerase is a homodimer with cooperative activity. *Journal of*  
606 *General Virology* 90:281-291.

- 607 26. Leen EN, Baeza G, Curry S. 2012. Structure of a murine norovirus NS6 protease-product  
608 complex revealed by adventitious crystallisation. *PloS one* 7:e38723.
- 609 27. Fernandes H, Leen EN, Cromwell Jr H, Pfeil M-P, Curry S. 2015. Structure determination  
610 of Murine Norovirus NS6 proteases with C-terminal extensions designed to probe protease-  
611 substrate interactions. *PeerJ* 3:e798.
- 612 28. Lloyd RE. 2013. Regulation of stress granules and P-bodies during RNA virus infection.  
613 *Wiley Interdiscip Rev RNA* 4:317-31.
- 614 29. Karst SM, Wobus CE, Lay M, Davidson J, Virgin HW, IV. 2003. STAT1-Dependent Innate  
615 Immunity to a Norwalk-Like Virus. *Science* 299:1575-1578.
- 616 30. Kedersha NL, Gupta M, Li W, Miller I, Anderson P. 1999. RNA-binding proteins TIA-1  
617 and TIAR link the phosphorylation of eIF-2 alpha to the assembly of mammalian stress  
618 granules. *J Cell Biol* 147:1431-42.
- 619 31. Duncan RF, Hershey JW. 1987. Translational repression by chemical inducers of the stress  
620 response occurs by different pathways. *Arch Biochem Biophys* 256:651-61.
- 621 32. McEwen E, Kedersha N, Song B, Scheuner D, Gilks N, Han A, Chen JJ, Anderson P,  
622 Kaufman RJ. 2005. Heme-regulated inhibitor kinase-mediated phosphorylation of  
623 eukaryotic translation initiation factor 2 inhibits translation, induces stress granule  
624 formation, and mediates survival upon arsenite exposure. *J Biol Chem* 280:16925-33.
- 625 33. Kedersha N, Chen S, Gilks N, Li W, Miller IJ, Stahl J, Anderson P. 2002. Evidence that  
626 ternary complex (eIF2-GTP-tRNA<sup>i</sup> Met)-deficient preinitiation complexes are core  
627 constituents of mammalian stress granules. *Molecular biology of the cell* 13:195-210.
- 628 34. Gorchakov R, Frolova E, Williams BR, Rice CM, Frolov I. 2004. PKR-dependent and-  
629 independent mechanisms are involved in translational shutoff during Sindbis virus infection.  
630 *Journal of virology* 78:8455-8467.

- 631 35. Khapersky DA, Hatchette TF, McCormick C. 2012. Influenza A virus inhibits cytoplasmic  
632 stress granule formation. *FASEB J* 26:1629-39.
- 633 36. White JP, Cardenas AM, Marissen WE, Lloyd RE. 2007. Inhibition of cytoplasmic mRNA  
634 stress granule formation by a viral proteinase. *Cell Host Microbe* 2:295-305.
- 635 37. Esclatine A, Taddeo B, Roizman B. 2004. Herpes simplex virus 1 induces cytoplasmic  
636 accumulation of TIA-1/TIAR and both synthesis and cytoplasmic accumulation of  
637 tristetraprolin, two cellular proteins that bind and destabilize AU-rich RNAs. *J Virol*  
638 78:8582-92.
- 639 38. Emara MM, Brinton MA. 2007. Interaction of TIA-1/TIAR with West Nile and dengue  
640 virus products in infected cells interferes with stress granule formation and processing body  
641 assembly. *Proc Natl Acad Sci U S A* 104:9041-6.
- 642 39. Clemens MJ. 2001. Initiation factor eIF2 alpha phosphorylation in stress responses and  
643 apoptosis. *Prog Mol Subcell Biol* 27:57-89.
- 644 40. McInerney GM, Kedersha NL, Kaufman RJ, Anderson P, Liljestrom P. 2005. Importance of  
645 eIF2alpha phosphorylation and stress granule assembly in alphavirus translation regulation.  
646 *Mol Biol Cell* 16:3753-63.
- 647 41. Balachandran S, Roberts PC, Brown LE, Truong H, Pattnaik AK, Archer DR, Barber GN.  
648 2000. Essential role for the dsRNA-dependent protein kinase PKR in innate immunity to  
649 viral infection. *Immunity* 13:129-141.
- 650 42. He B. 2006. Viruses, endoplasmic reticulum stress, and interferon responses. *Cell death and*  
651 *differentiation* 13:393.
- 652 43. Shimazawa M, Hara H. 2006. Inhibitor of double stranded RNA-dependent protein kinase  
653 protects against cell damage induced by ER stress. *Neuroscience Letters* 409:192-195.
- 654 44. Sidrauski C, Acosta-Alvear D, Khoutorsky A, Vedantham P, Hearn BR, Li H, Gamache K,  
655 Gallagher CM, Ang KKH, Wilson C, Okreglak V, Ashkenazi A, Hann B, Nader K, Arkin

- 656 MR, Renslo AR, Sonenberg N, Walter P. 2013. Pharmacological brake-release of mRNA  
657 translation enhances cognitive memory. *eLife* 2:e00498.
- 658 45. Emmott E, Sorgeloos F, Caddy SL, Vashist S, Sosnovtsev S, Lloyd R, Heesom K, Locker  
659 N, Goodfellow I. 2017. Norovirus-Mediated Modification of the Translational Landscape  
660 via Virus and Host-Induced Cleavage of Translation Initiation Factors. *Molecular*  
661 *&& Cellular Proteomics* 16:S215.
- 662 46. Li MMH, MacDonald MR, Rice CM. 2015. To translate, or not to translate: viral and host  
663 mRNA regulation by interferon-stimulated genes. *Trends in Cell Biology* 25:320-329.
- 664 47. Anderson P. 2008. Post-transcriptional control of cytokine production. *Nature Immunology*  
665 9:353.
- 666 48. Humoud MN, Doyle N, Royall E, Willcocks MM, Sorgeloos F, van Kuppeveld F, Roberts  
667 LO, Goodfellow IG, Langereis MA, Locker N. 2016. Feline Calicivirus Infection Disrupts  
668 Assembly of Cytoplasmic Stress Granules and Induces G3BP1 Cleavage. *Journal of*  
669 *Virology* 90:6489.
- 670 49. Reineke LC, Lloyd RE. 2013. Diversion of stress granules and P-bodies during viral  
671 infection. *Virology* 436:255-267.
- 672 50. Orchard RC, Wilen CB, Doench JG, Baldrige MT, McCune BT, Lee YC, Lee S, Pruet-  
673 Miller SM, Nelson CA, Fremont DH, Virgin HW. 2016. Discovery of a proteinaceous  
674 cellular receptor for a norovirus. *Science* 353:933-6.
- 675 51. Hanson PJ, Zhang HM, Hemida MG, Ye X, Qiu Y, Yang D. 2012. IRES-Dependent  
676 Translational Control during Virus-Induced Endoplasmic Reticulum Stress and Apoptosis.  
677 *Frontiers in Microbiology* 3:92.
- 678 52. Daughenbaugh KF, Fraser CS, Hershey JW, Hardy ME. 2003. The genome - linked protein  
679 VPg of the Norwalk virus binds eIF3, suggesting its role in translation initiation complex  
680 recruitment. *The EMBO journal* 22:2852-2859.

- 681 53. Daughenbaugh KF, Wobus CE, Hardy ME. 2006. VPg of murine norovirus binds translation  
682 initiation factors in infected cells. *Virology journal* 3:1.
- 683 54. Chung L, Bailey D, Leen EN, Emmott EP, Chaudhry Y, Roberts LO, Curry S, Locker N,  
684 Goodfellow IG. 2014. Norovirus translation requires an interaction between the C terminus  
685 of the genome-linked viral protein VPg and eukaryotic translation initiation factor 4G.  
686 *Journal of Biological Chemistry* 289:21738-21750.
- 687 55. Martinez FO, Sica A, Mantovani A, Locati M. 2008. Macrophage activation and  
688 polarization. *Front Biosci* 13:453-461.
- 689 56. Enosi Tuipulotu D, Netzler NE, Lun JH, Mackenzie JM, White PA. 2017. RNA Sequencing  
690 of Murine Norovirus-Infected Cells Reveals Transcriptional Alteration of Genes Important  
691 to Viral Recognition and Antigen Presentation. *Front Immunol* 8:959.
- 692 57. Levenson EA, Martens C, Kanakabandi K, Turner CV, Virtaneva K, Paneru M, Ricklefs S,  
693 Sosnovtsev SV, Johnson JA, Porcella SF, Green KY. 2018. Comparative Transcriptomic  
694 Response of Primary and Immortalized Macrophages to Murine Norovirus Infection. *J*  
695 *Immunol* 200:4157-4169.
- 696 58. McCartney SA, Thackray LB, Gitlin L, Gilfillan S, Virgin HW, Colonna M. 2008. MDA-5  
697 recognition of a murine norovirus. *PLoS Pathog* 4:e1000108.
- 698 59. Mazroui R, Sukarieh R, Bordeleau ME, Kaufman RJ, Northcote P, Tanaka J, Gallouzi I,  
699 Pelletier J. 2006. Inhibition of ribosome recruitment induces stress granule formation  
700 independently of eukaryotic initiation factor 2alpha phosphorylation. *Mol Biol Cell*  
701 17:4212-9.
- 702 60. Anderson P, Kedersha N. 2006. RNA granules. *J Cell Biol* 172:803-8.
- 703 61. Holcik M, Sonenberg N. 2005. Translational control in stress and apoptosis. *Nat Rev Mol*  
704 *Cell Biol* 6:318-27.

- 705 62. Khong A, Jan E. 2011. Modulation of stress granules and P bodies during dicistrovirus  
706 infection. *J Virol* 85:1439-51.
- 707 63. Lindquist ME, Lifland AW, Utley TJ, Santangelo PJ, Crowe JE, Jr. 2010. Respiratory  
708 syncytial virus induces host RNA stress granules to facilitate viral replication. *J Virol*  
709 84:12274-84.
- 710 64. Mosenkis J, Daniels-McQueen S, Janovec S, Duncan R, Hershey JW, Grifo JA, Merrick  
711 WC, Thach RE. 1985. Shutoff of host translation by encephalomyocarditis virus infection  
712 does not involve cleavage of the eucaryotic initiation factor 4F polypeptide that  
713 accompanies poliovirus infection. *J Virol* 54:643-5.
- 714 65. Etchison D, Milburn S, Edery I, Sonenberg N, Hershey J. 1982. Inhibition of HeLa cell  
715 protein synthesis following poliovirus infection correlates with the proteolysis of a 220,000-  
716 dalton polypeptide associated with eucaryotic initiation factor 3 and a cap binding protein  
717 complex. *Journal of Biological Chemistry* 257:14806-14810.
- 718 66. Lloyd R, Grubman M, Ehrenfeld E. 1988. Relationship of p220 cleavage during  
719 picornavirus infection to 2A proteinase sequencing. *Journal of virology* 62:4216-4223.
- 720 67. Lloyd RE, Jense H, Ehrenfeld E. 1987. Restriction of translation of capped mRNA in vitro  
721 as a model for poliovirus-induced inhibition of host cell protein synthesis: relationship to  
722 p220 cleavage. *Journal of virology* 61:2480-2488.
- 723 68. McInerney GM, Kedersha NL, Kaufman RJ, Anderson P, Liljestrom P. 2005. Importance of  
724 eIF2 $\alpha$  phosphorylation and stress granule assembly in alphavirus translation regulation.  
725 *Molecular biology of the cell* 16:3753-3763.

726

## 727 **Figure Legends**

728 **Figure 1. MNV infection phosphorylates eIF2 $\alpha$  and shuts down host cell translation: (A)**

729 BMMs were uninfected, uninfected and NaAs treated (250  $\mu$ M for 20 mins) or MNV-infected

730 (MOI 5) for 12 hrs. The WB was immunolabelled with anti-NS7, anti-p-eIF2 $\alpha$  and anti-eIF2 $\alpha$   
731 antibodies **(B)** Immunoblot analysis of uninfected, uninfected and NaAs treated (250  $\mu$ M for 20  
732 mins) or MNV-infected (MOI 5) cell lysates harvested at 3, 6, 9 and 12 h.p.i. The WB was  
733 immunolabelled with anti-NS7, anti-p-eIF2 $\alpha$  and anti-actin antibodies. **(C and D)** BMM cells were  
734 either infected with MNV (MOI 5) or left uninfected and analysed for their translation using  
735 puromycin (10  $\mu$ g/mL). **(C)** Immunoblot analysis of puromycin-treated (20 mins) cell lysates  
736 harvested at 3, 6, 9, 12 and 15 h.p.i. The WB was immunolabelled with anti-puromycin, anti-NS7,  
737 anti-p-eIF2 $\alpha$  and anti-actin antibodies. **(D)** IF analysis of puromycin treated (10  $\mu$ g/ml for 30 mins)  
738 cells at 6, 9 and 12 hrs post infection. Cells were stained with anti-puromycin, anti-NS5 and DAPI  
739 for the merged image. Stars indicate uninfected cells displaying high signal for anti-puromycin.  
740 Samples were analysed via the Zeiss LSM 710 confocal microscope and analysed with the ZEN  
741 software.

742

743 **Figure 2. Treatment with PKR inhibitor C16 abolishes phosphorylation of eIF2 $\alpha$  but does not**  
744 **rescue host translation:** **(A)** RAW 264.7 were either uninfected or MNV-infected (MOI 5), treated  
745 with either DMSO, C16 (1  $\mu$ M), ISRIB (0.5  $\mu$ M) or C16+ISRIB at 1 h.p.i for 12 hrs, before cell  
746 lysate samples were obtained. Lysates were analysed via immunoblotting and immunolabelled with  
747 anti-NS7, anti-p-eIF2 $\alpha$  or anti-actin antibodies. **(B)** RAW 264.7 were either uninfected or MNV-  
748 infected (MOI 5), treated with either DMSO or C16 (1  $\mu$ M) at 1 h.p.i for 12 or 15 hrs. 30 mins  
749 before cell lysate samples were obtained, cells were treated with puromycin (10  $\mu$ g/ml for 30 mins)  
750 and immunolabelled with anti-NS7, anti-p-eIF2 $\alpha$ , anti-puromycin and anti-calnexin antibodies.

751

752 **Figure 3. Expression of MNV NS3 protein abolishes host cellular translation:** **(A)** HEK 293T  
753 cells were transfected with cDNA expression plasmids encoding the individual HIS-tagged MNV  
754 NS proteins for 18 hrs, at which point the cells were pulsed with puromycin as previously described

755 and whole cell lysates were obtained and immunolabelled with anti-puromycin antibodies. **(B)**  
756 Densitometry analysis of puromycin signal in MNV NS protein transfected cells compared to mock  
757 transfected cells (n=3, ANOVA, +/- SEM, \*\*p<0.01, \*\*\*\*p<0.0001). **(C)** Vero cells were  
758 transfected with the single HIS-tagged MNV NS proteins and treated with puromycin before cells  
759 were fixed and permeabilised for IF. Cells were immunolabelled with antibodies against puromycin  
760 (green), 6xHIS (red) and DAPI. Samples were captured via the Zeiss LSM 710 confocal  
761 microscope and analysed with the ZEN software.

762

763 **Figure 4. MNV infection in macrophages induces cytokine transcription but inhibits their**  
764 **secretion:** **(A)** RAW 264.7 were either MNV-infected (MOI 5) for 9, 12 and 15 hrs or Poly(I:C)  
765 treated. RNA samples were taken and analysed via RT-qPCR for the following cytokines (i) IFN $\beta$ ,  
766 (ii) TNF $\alpha$  and (iii) IL-6. **(B)** RAW 264.7 were either mock-infected, infected with MNV (MOI 5)  
767 for 9, 12 and 15 hrs, Poly(I:C) or Poly(I:C) + BFA treated. Cell culture supernatants were analysed  
768 for the secretion of the specific cytokines (i) IFN $\beta$ , (II) TNF $\alpha$  and (III) IL-6 via ELISA. (n=3,  
769 ANOVA, +/- SEM, \*\*p<0.01, \*\*\*\*p<0.0001).

770

771 **Figure 5. MNV-infection alters SG formation in sodium arsenite treated cells without**  
772 **affecting key SG protein levels.** **(A)** BMMs were mock-infected (panels a-c), infected with MNV  
773 (MOI 5) for 12 hrs (panels d-f), NaAs treated (250  $\mu$ M for 20 mins) (panels g-i) or MNV infected  
774 and NaAs treated (panels j-l). Cells were fixed for IF analysis and immunolabelled with eIF3 $\eta$   
775 (green), VPg (red, indicating infection) and DAPI (blue). Samples were captured via the Zeiss LSM  
776 710 confocal microscope and analysed with the ZEN software. **(B and C)** SGs in NaAs treated  
777 mock (218 cells) and MNV-infected (182 cells) samples were counted from two independent  
778 experiments each and collated. **(B)** Box and whiskers plot where whiskers represent min to max and  
779 box represents mean with error bars +/- SEM and unpaired two-tailed *t*-test was performed (\*\*\*\*



780 denotes  $p < 0.0001$ ). (C) Quantitation demonstrating the total number of cells (y-axis) containing  
781 various amount of SGs (x-axis). Blue line represents the number of SGs in uninfected cells ( $n=218$   
782 cells) and the red line represents the number of SGs in MNV-infected cells ( $n=182$  cells) (D) BMM  
783 cells were either mock-infected or MNV-infected (MOI 5) and whole cell lysates were collected at  
784 3, 6, 9 and 12 hpi. WB was immunolabelled with anti-eIF3 $\eta$ , anti-G3BP1, anti-TIA-1, anti-NS7 and  
785 anti-actin antibodies.

786

787 **Figure 6. MNV recruits G3BP1 and requires G3BP1 to efficient viral replication.** (A) BMMs  
788 were mock-infected (panels a-d), NaAs treated (250  $\mu$ M for 20 mins) (panels e-h), infected with  
789 MNV (MOI 5) for 12 hrs (panels i-l) or MNV infected and NaAs treated (panels m-p). Cells were  
790 fixed for IF analysis and immunolabelled with anti-eIF3 $\eta$  (magenta), anti-G3BP1 (green), VPg (red,  
791 indicating infection) and DAPI (blue). Samples were captured via the Zeiss LSM 710 confocal  
792 microscope and analysed with the ZEN software. (B-C) BMMs were untreated, siControl or  
793 siG3BP1 treated and either mock-infected or MNV infected (MOI 5). (B) Whole cell lysates were  
794 collected for WB (immunolabelled with anti-NS7, anti-G3BP1 and anti-GAPDH) and (C) tissue  
795 culture fluids were collected for plaque assay. ( $n=3$ , mean  $\pm$  SEM and unpaired two-tailed t-test  
796 was performed). (D) Schematic demonstrating WT-mG3BP1, mG3BP1- $\Delta$ RRG and mG3BP1-  
797  $\Delta$ RRMRGG mutant constructs. Each construct was transfected into BV2 and expression levels were  
798 demonstrated by WB. (E) WT-BV2 cells, BV2 -mG3BP1-KO cells were transfected with WT-  
799 mG3BP1, mG3BP1- $\Delta$ RRG, mG3BP1- $\Delta$ RRMRGG and an empty vector. Following transfection,  
800 cells were infected with MNV and 12 and 24 h.p.i tissue culture fluids were collected for plaque  
801 assay. ( $n=3$ , mean  $\pm$  SEM and unpaired two-tailed t-test was performed).

802

803 **Figure 7. Model**

804 During MNV infection, viral factors such as proteins and/or RNA (blue hexagon) phosphorylate  
805 eIF2 $\alpha$  (green oval) via PKR (orange rectangle), as well as stalling translation initiation by the MNV  
806 NS3 protein, however this translational arrest is uncoupled from the PKR–p-eIF2 $\alpha$  axis. These  
807 stalled preinitiation complexes typically aggregate with G3BP1 (grey oval) and form SGs (red  
808 cloud), however MNV viral factors sequester G3BP1 to the MNV RC (yellow circle) to promote  
809 replication. This allows the inhibition of cap-dependent host cell translation, as well as inhibiting  
810 the formation of SGs.

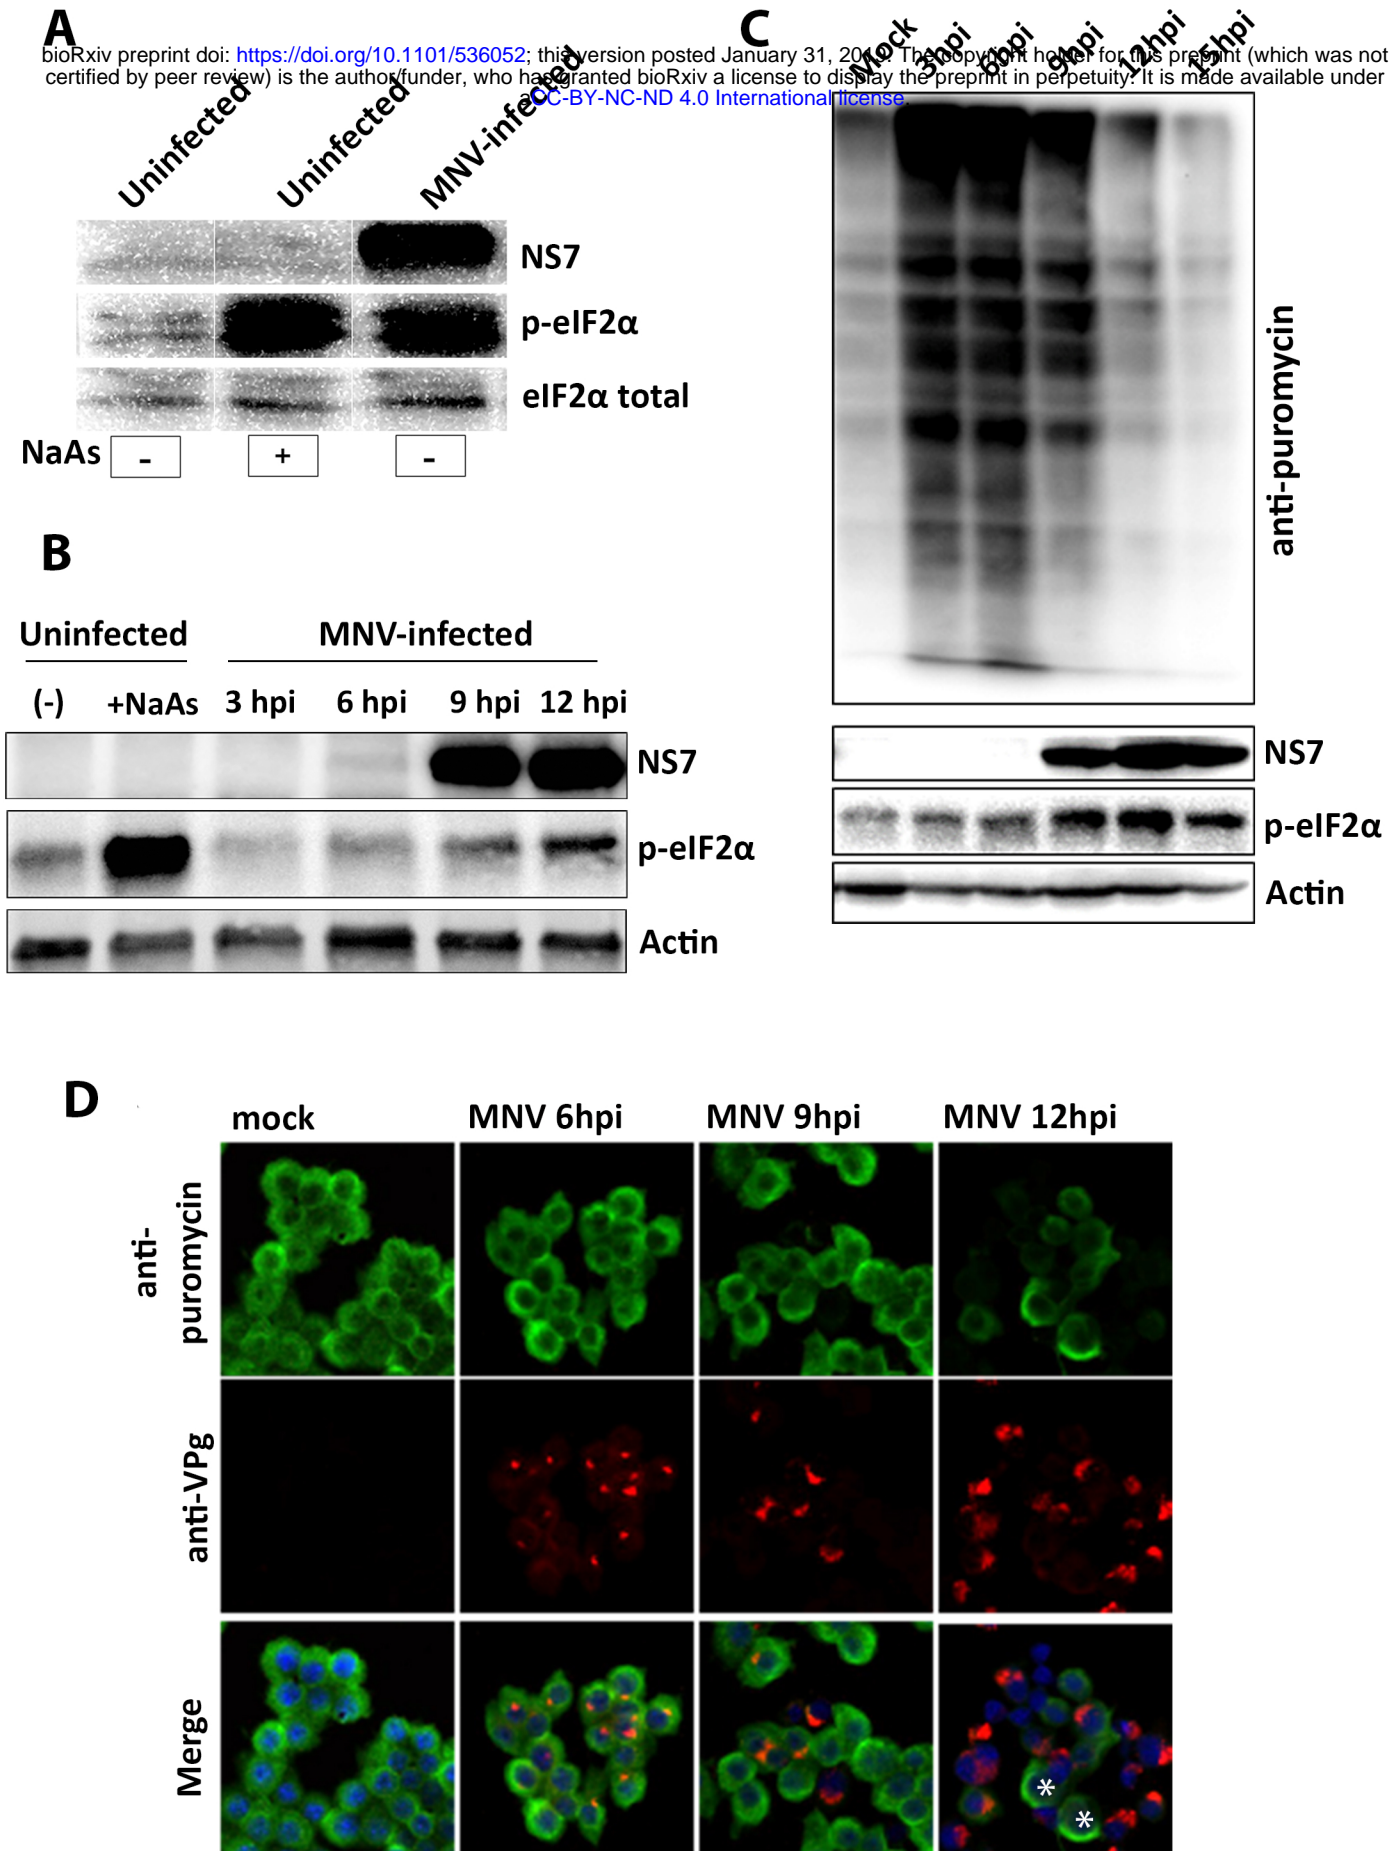

Figure 1  
Fritzlar, Aktepe et al

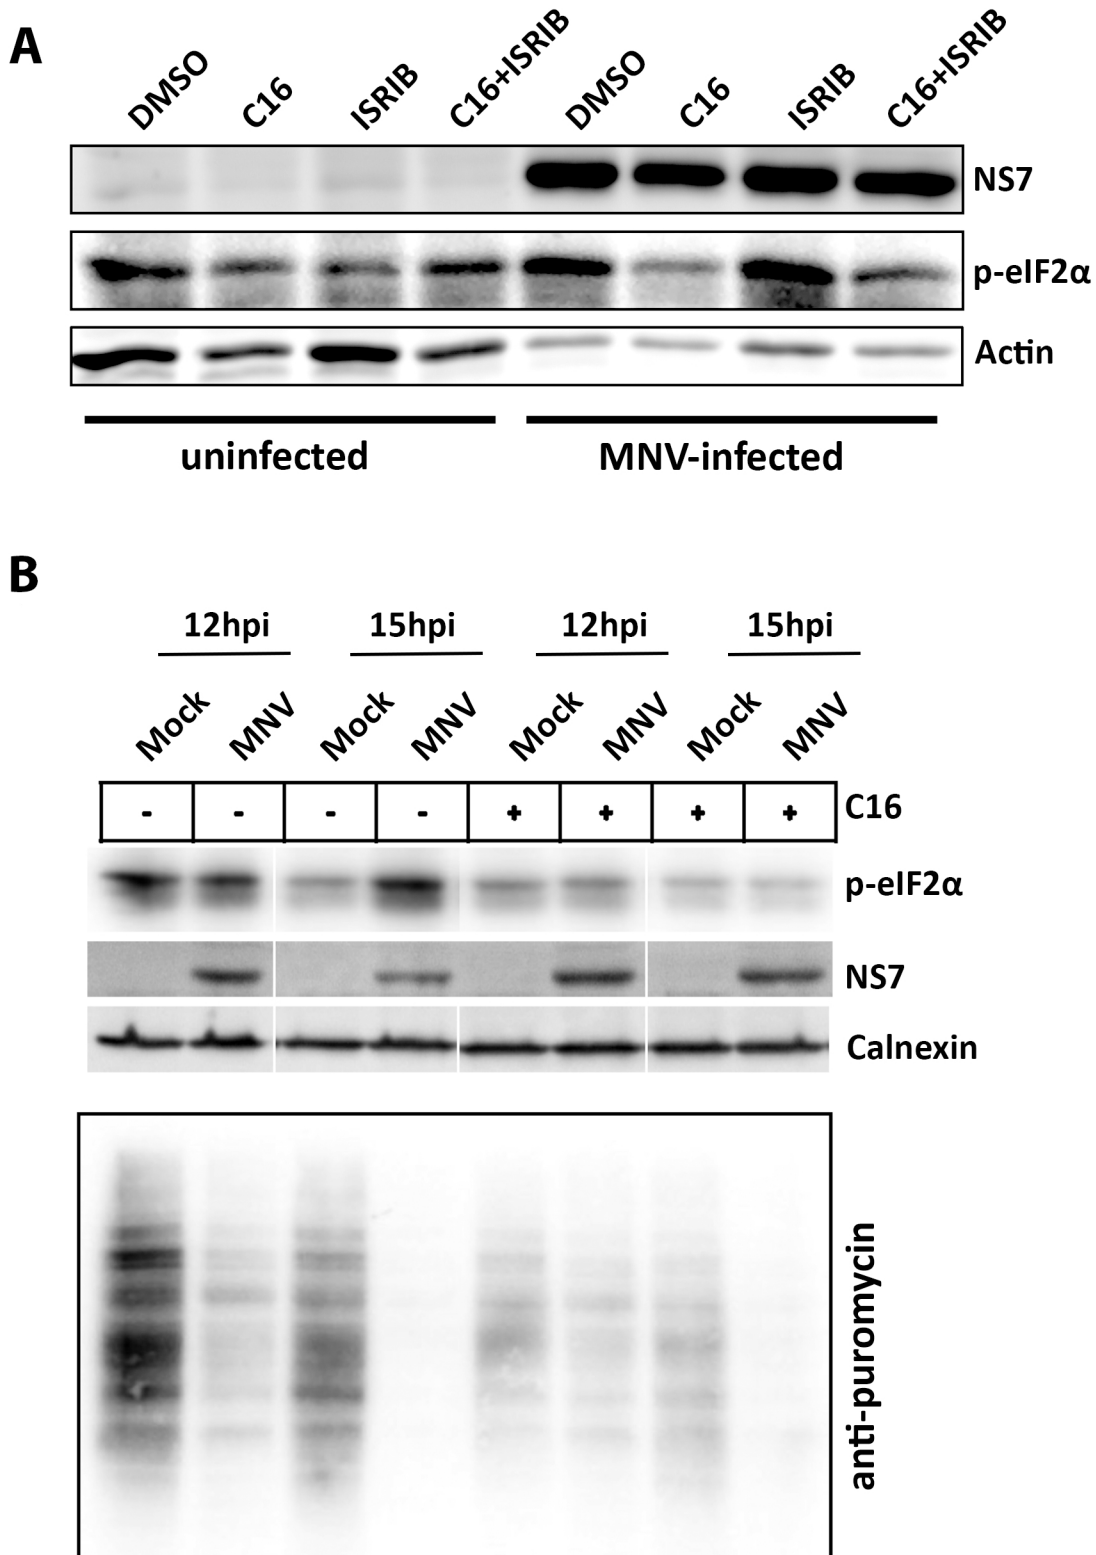

Figure 2  
Fritzlar, Aktepe et al

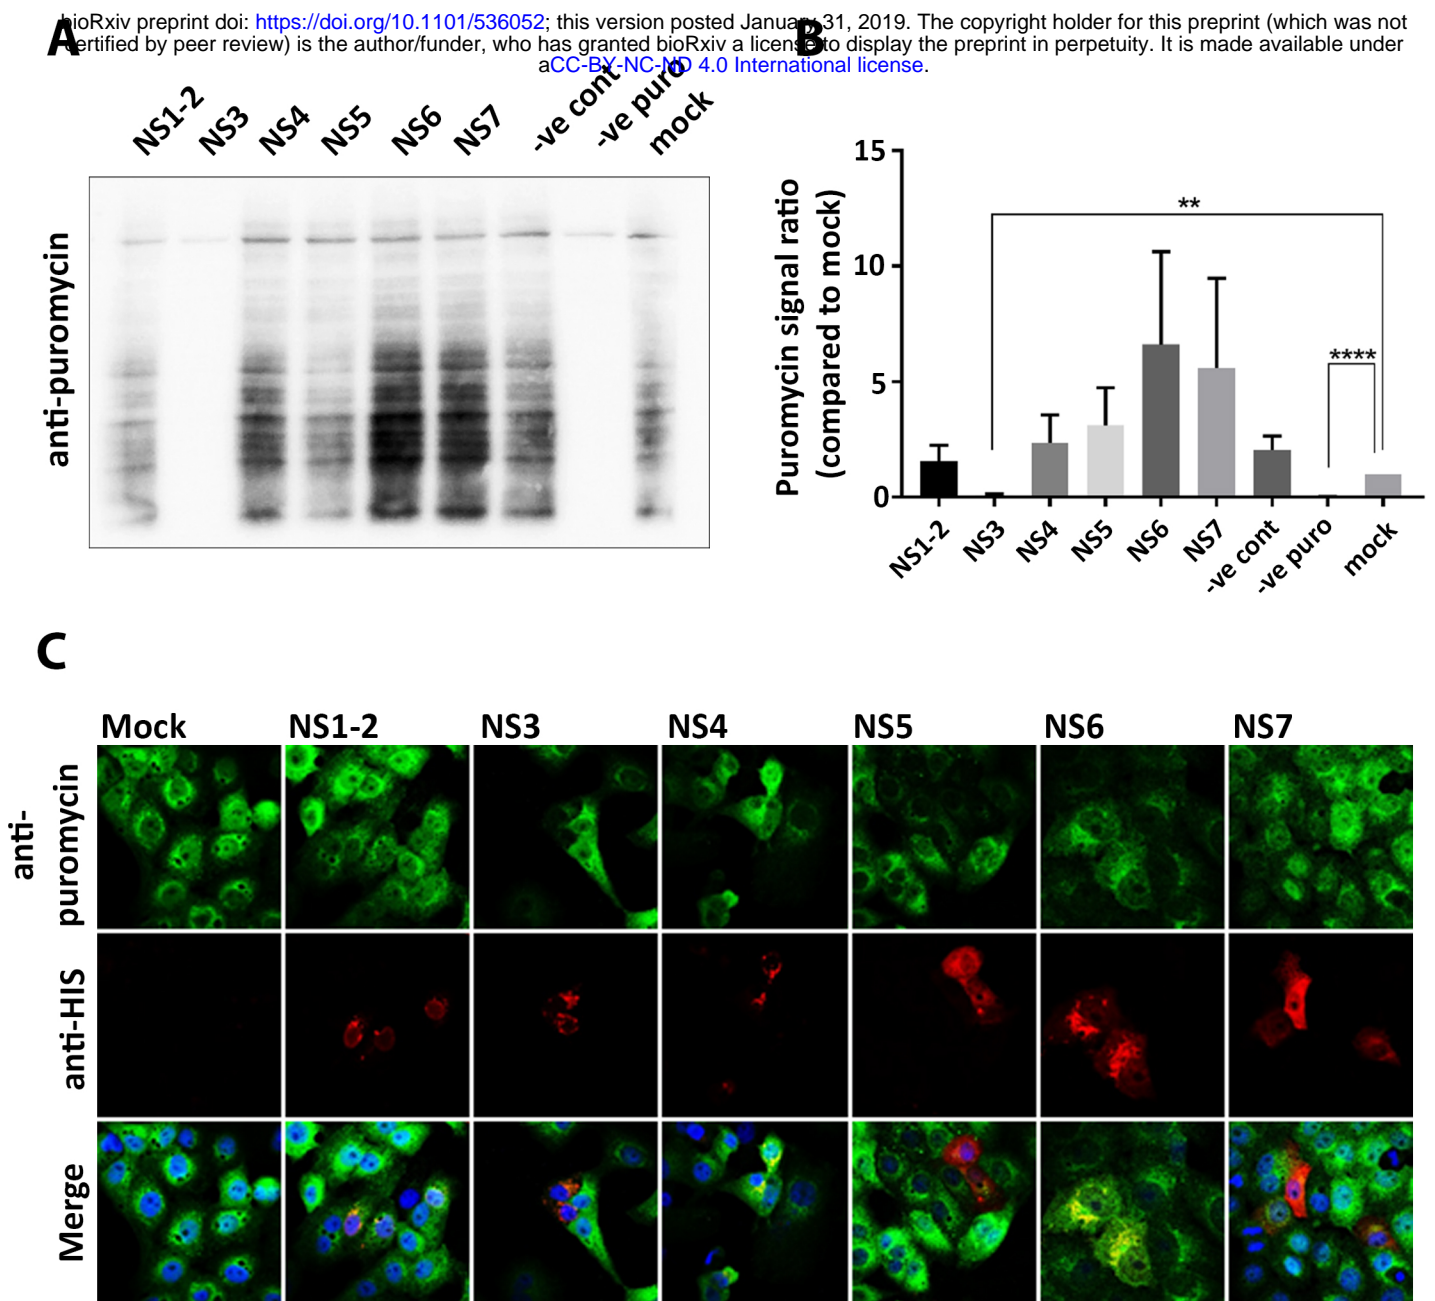

Figure 3  
Fritzlar, Aktepe et al

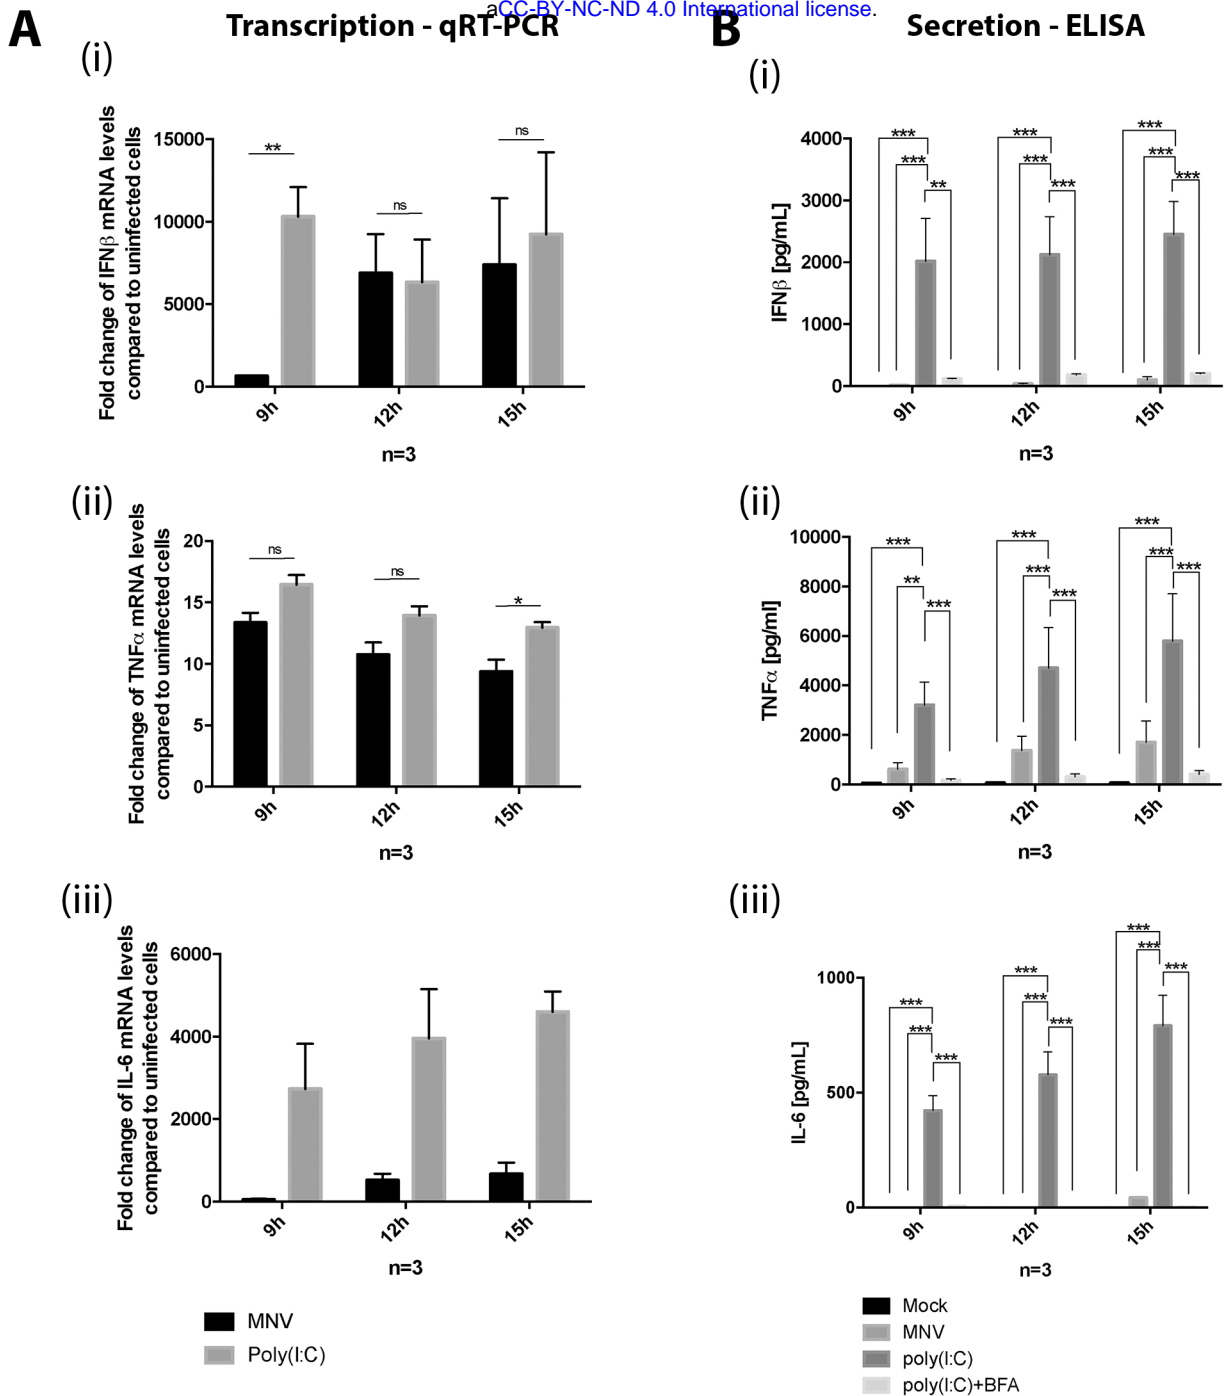

Figure 4  
Fritzlar, Aktepe et al

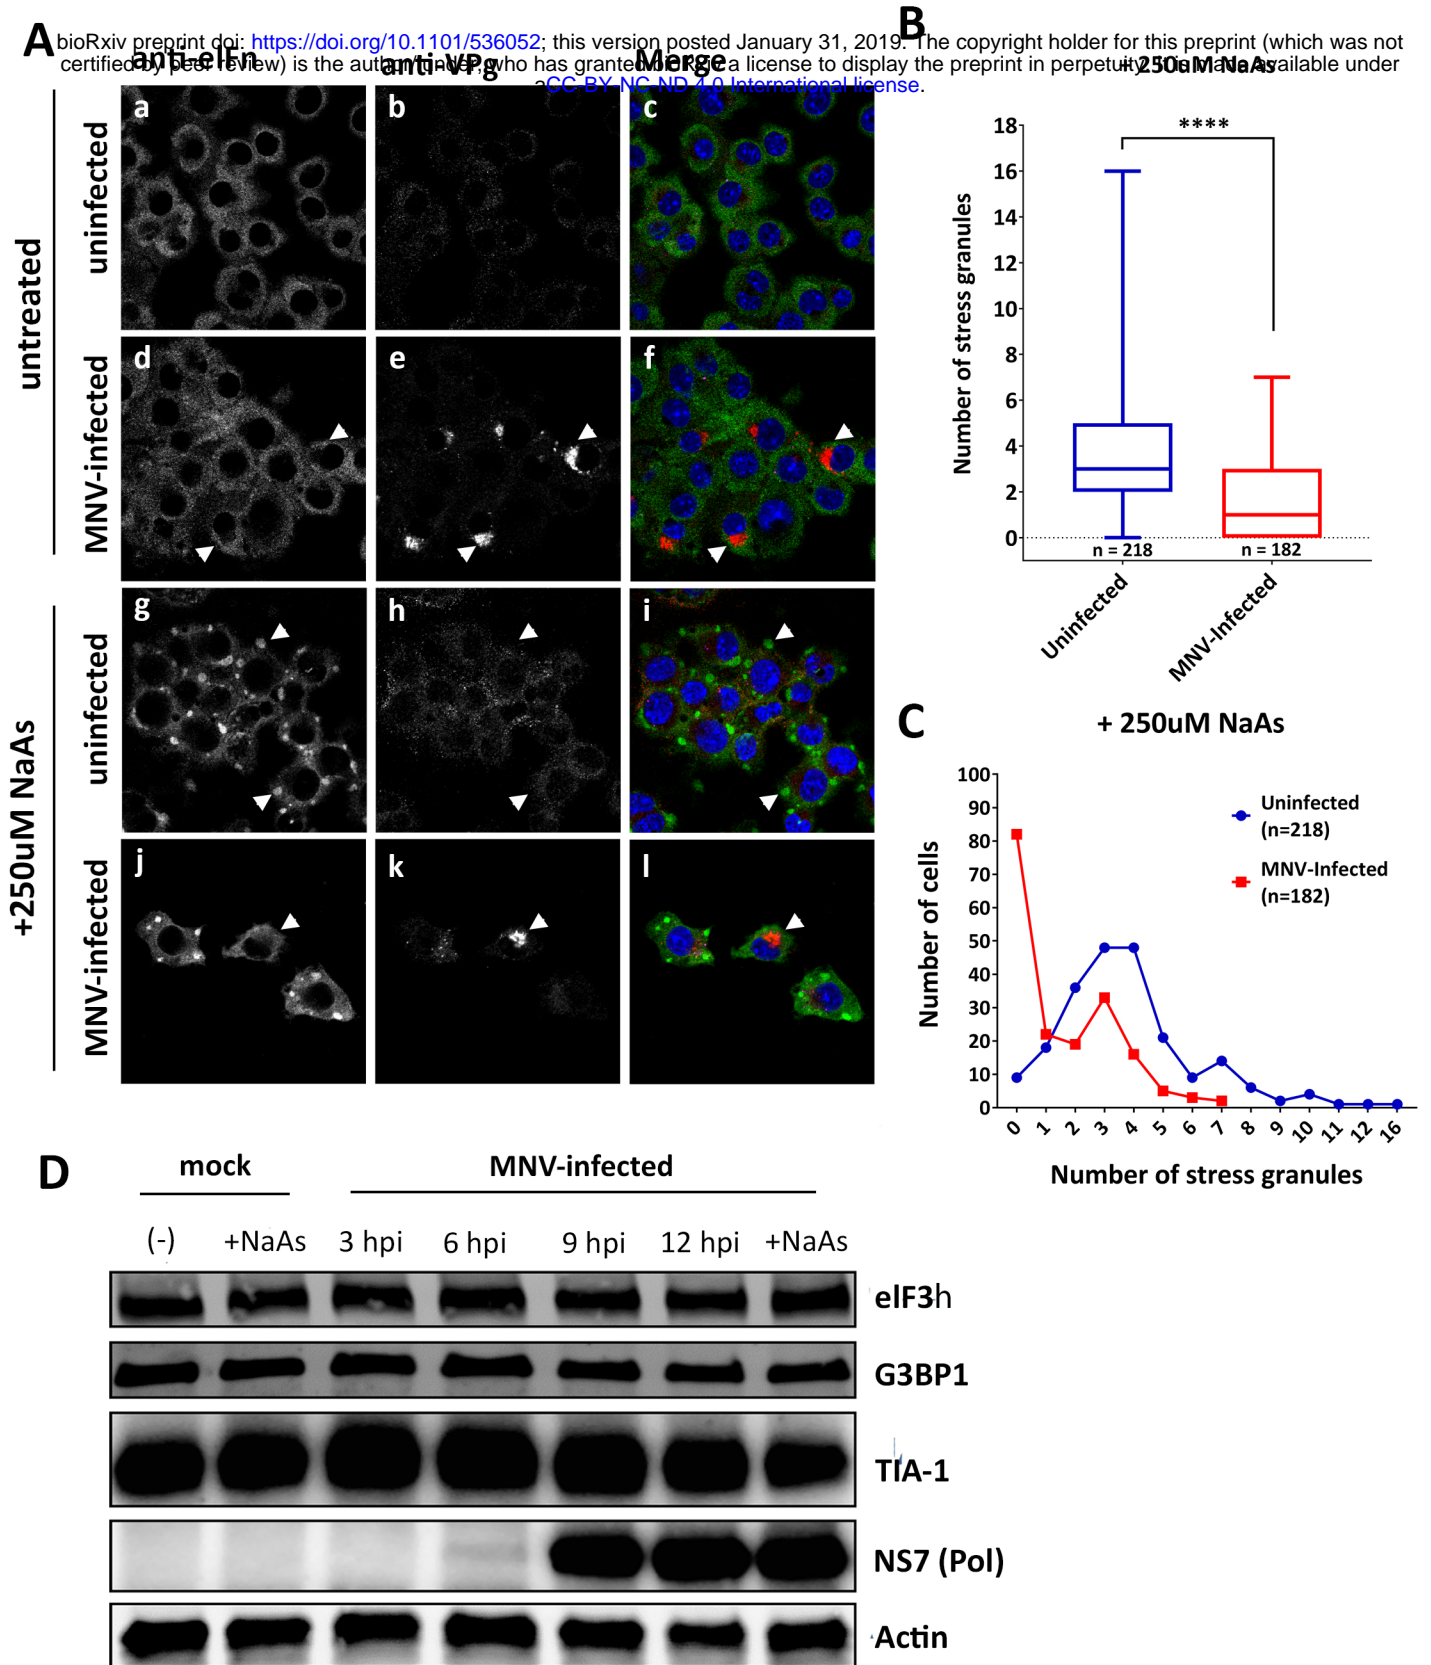

Figure 5  
Fritzlar, Aktepe et al

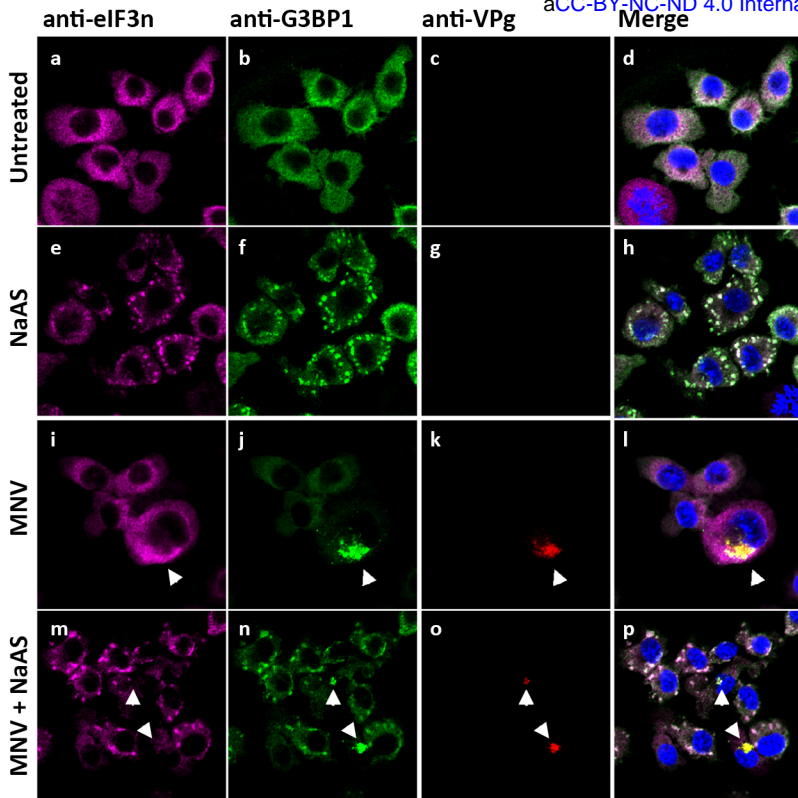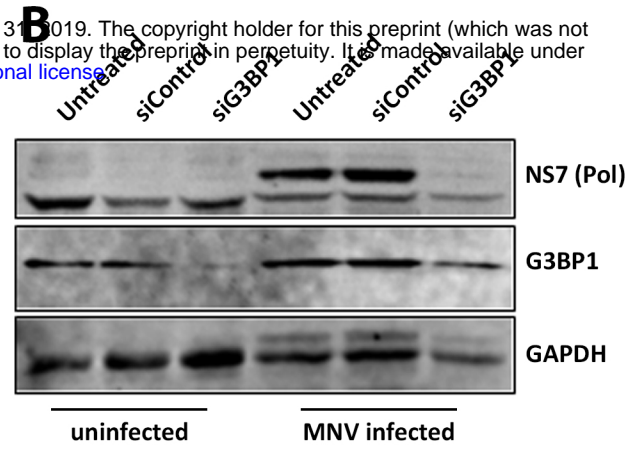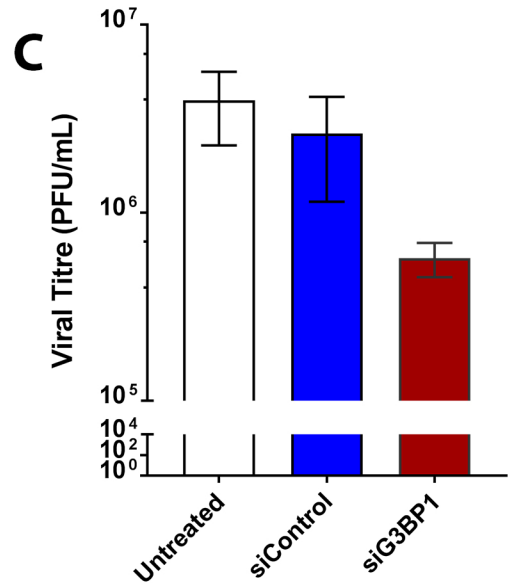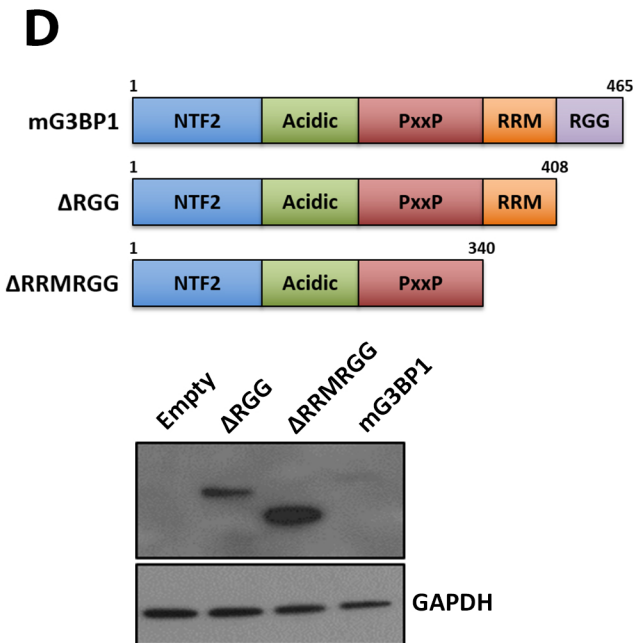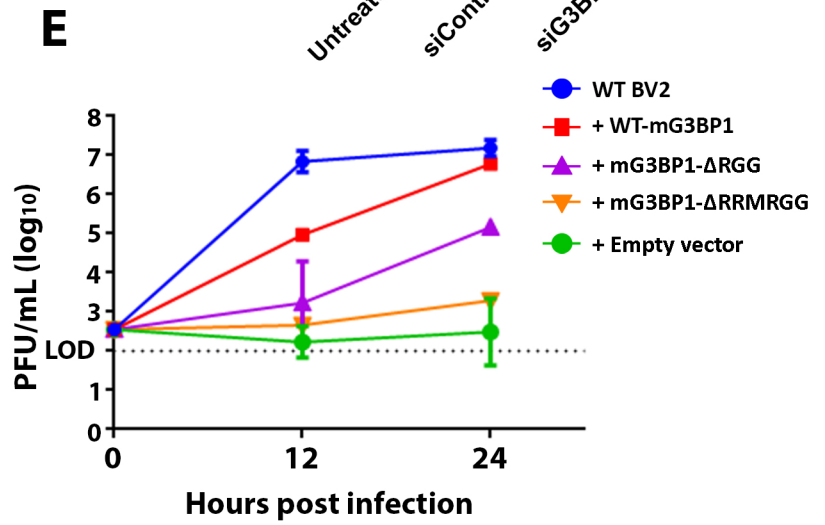

Figure 6  
Fritzlar, Aktepe et al



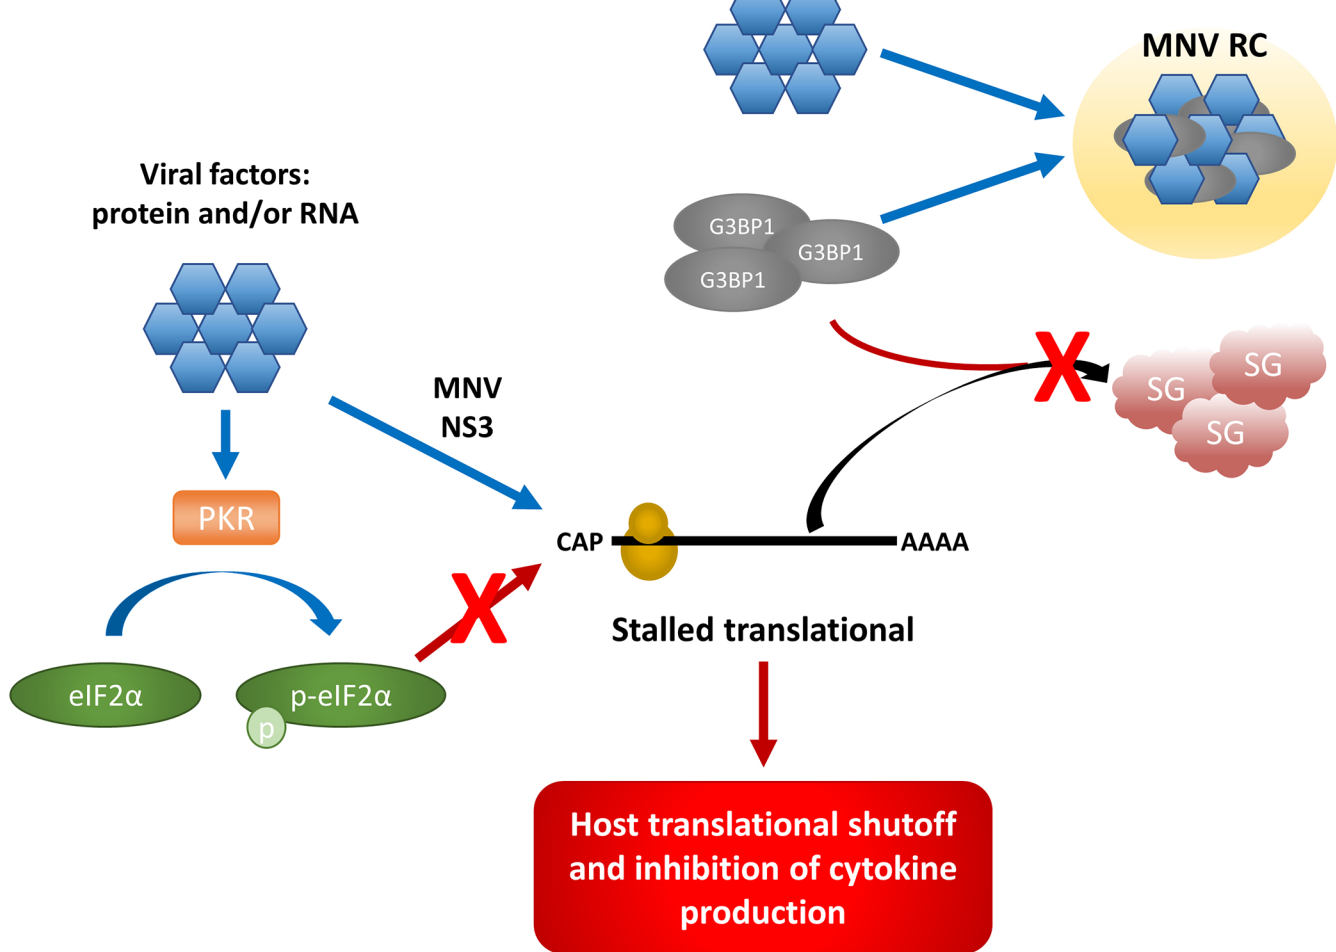

Figure 7  
Fritzlar, Aktepe et al
