# Supplementary material for: Mouse Norovirus infection arrests host cell translation uncoupled from the stress granule-PKR-eIF2α axis
Source: bioRxiv or medRxiv preprint supplement (doi:10.1101/536052), 2019-01-31
Supplement: Supplementary file [file media-2.pdf]

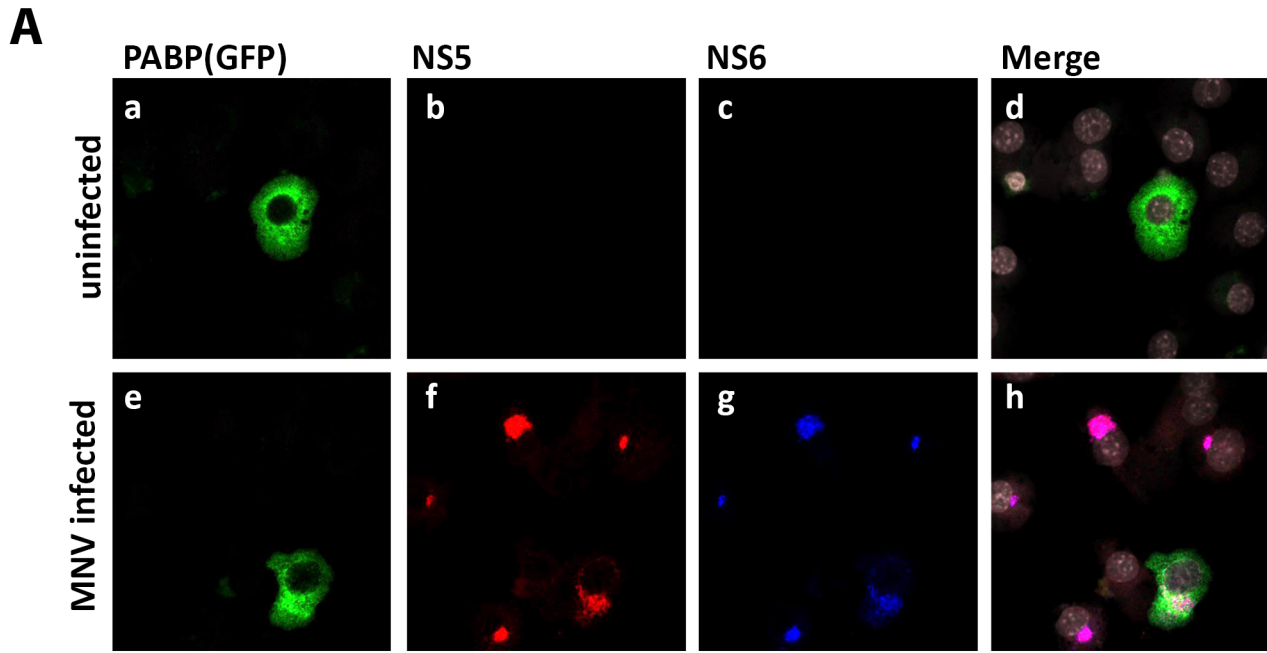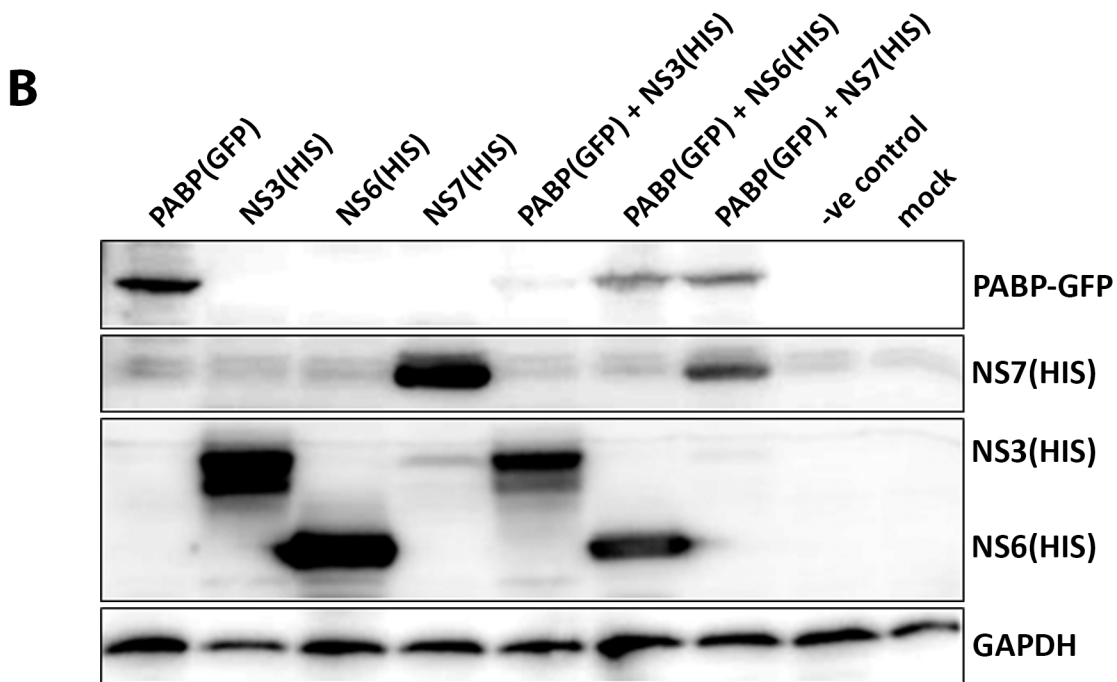

Suppl Figure 1: **(A)** MNV infection does not effect PABP levels however **(B)** NS3 expression reduces PABP levels
