# Supplementary material for: Mouse Norovirus infection arrests host cell translation uncoupled from the stress granule-PKR-eIF2α axis
Source: bioRxiv or medRxiv preprint supplement (doi:10.1101/536052), 2019-01-31
Supplement: Supplementary file [file media-3.pdf]

**A**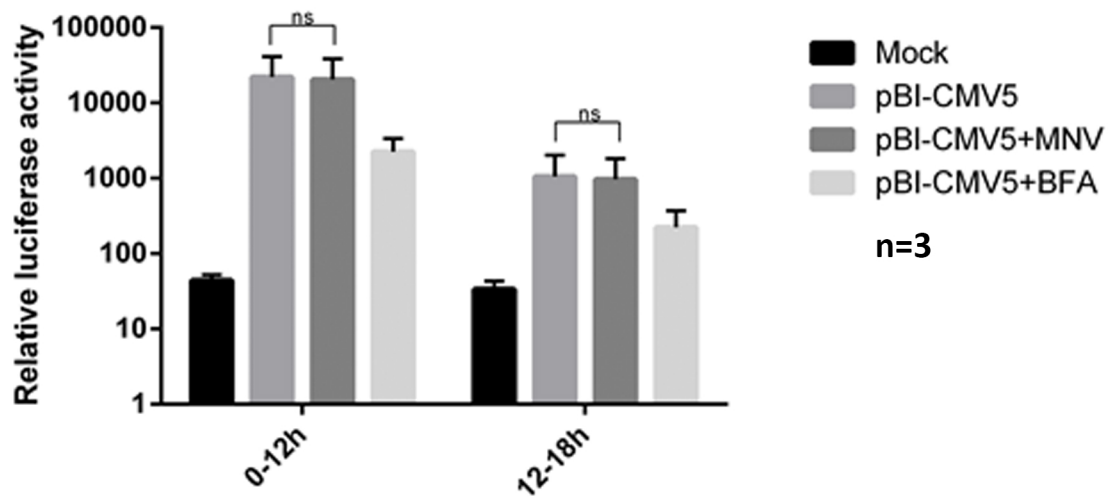**B**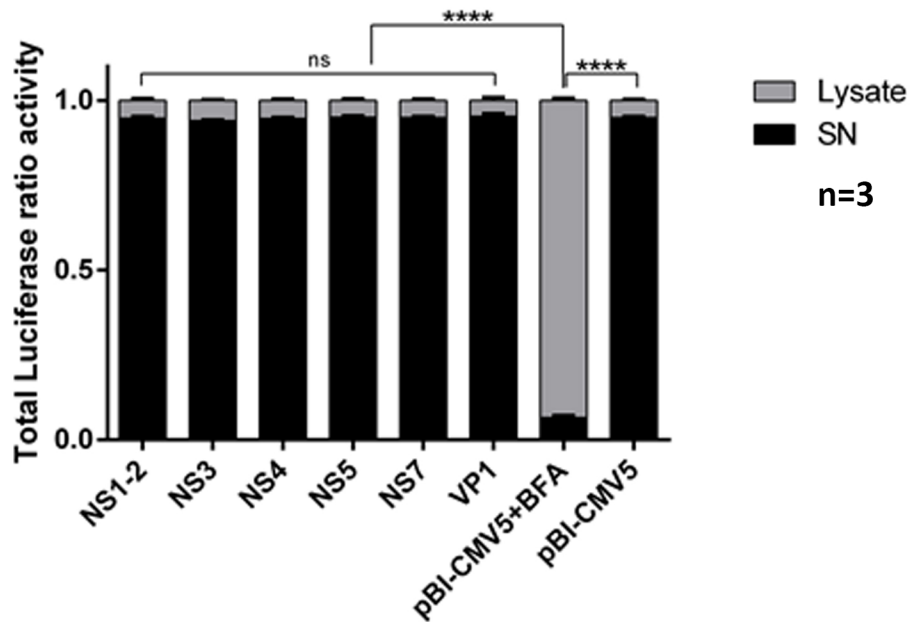

Suppl Figure 2: MNV infection and expression of individual viral proteins does not effect general protein secretion.

Fritzlar, Aktepe et al
